# Supplementary material for: Menstrual Hygiene Practices, WASH Access and the Risk of Urogenital Infection in Women from Odisha, India
Source: PLoS One. 2015 Jun 30;10(6):e0130777. doi: 10.1371/journal.pone.0130777 (PMC4488331; doi:10.1371/journal.pone.0130777)
Supplement: S2 Fig — (XLSX) [file pone.0130777.s002.xlsx]

## Sheet: Data
pid1	age1	mar_stat1	biyrs_mar1	bir_mon1	relgn1	cas_trb1	hig_edu1	hig_edu1cat3rev	occu1	mth_incm14	15.a.watch_clock	15.b.pressure_cooker	15.c.telephone_mobilephone	15.d.television_	15.e.refrigerator	15.f.chair_	15.g.radio	15.h.mattress_	15.i.cot_bed	15.j.table_	15.k.electric_fan	15.l.sewing_machine	15.m.water_pump	15.n.bicycle_	15.o.motorbike_scooter	15.p.car_	15.q.animaldrawn_cart	15.r.thresher_	15.s.tractor_	15.t.agricultural_land	wealth_index2	18.vag_dis	19.fel_itch	20.itch_uri	21.gen_sor	28.use_con	29.wch_con	30.anti_trt	31.recu_cli	32.prob_apper	33.chg_hyg	34.a.menstrual_absorbent	34.b.vaginal_washing	34.c.body_washing	34.d.absorbent_washing	34.e.place_changing	34.f.place_defecate	34.g.place_urinate	abs_mat35
1001	37	2	10	0	1	3	4	0	2	1	1	1	1	1	0	1	0	0	1	1	1	0	0	1	1	0	0	0	0	1	1	1	0	0	0	1	1	1	1	5	0								1
1002	32	2	10	0	1	3	4	0	2	1	0	0	1	0	0	0	0	0	1	0	1	0	0	1	0	0	0	0	0	1	1	1	1	0	0	1	2	1	1	1	0								1
1003	20	2	1	0	1	2	4	0	2	1	1	1	1	1	1	1	1	0	1	1	1	0	0	1	1	0	0	0	0	0	2	1	0	0	0	0		1	1	1	0								1
1004	38	2	18	0	1	3	4	0	2	1	1	1	1	1	1	1	0	1	1	1	1	0	0	1	0	0	0	0	0	1	2	0	0	0	0	0		0	1	2	0								1
1005	35	2	8	0	1	3	4	0	2	1	1	1	1	1	1	1	0	1	1	1	1	0	0	1	1	0	0	0	0	1	2	0	0	0	0	1	2	0	1	5	0								0
1006	42	2	24	0	1	3	1	2	2	0	0	0	1	1	0	0	0	0	1	1	1	0	0	1	0	0	0	0	0	0	1	0	0	0	0	0		0	0	5	0								1
1007	30	2	10	0	1	3	2	1	2	1	0	0	1	0	0	0	0	0	0	0	1	0	0	1	0	0	0	0	0	1	1	1	0	0	0	0		0	1	2	0								1
1008	25	2	2	0	1	3	6	0	2	1	1	1	1	1	1	1	0	1	1	1	1	0	0	0	1	0	0	0	0	1	2	1	1	1	0	1	1	1	1	1	0								0
1009	22	2	3	0	1	3	4	0	2	1	1	1	1	1	0	1	0	1	1	0	1	0	0	0	0	0	0	0	0	0	1	1	0	0	0	0		1	1	5	0								0
1010	25	2	3	0	1	3	6	0	2	1	1	1	1	1	1	1	0	1	1	1	1	0	1	1	1	0	0	0	0	0	2	0	0	0	0	0		0	0										0
1011	25	1		0	1	3	3	1	1	1	0	0	1	1	0	0	0	0	1	1	1	0	0	1	0	0	0	0	0	0	1	1	0	0	0			0	1	5	0								1
1012	38	2	13	0	1	3	4	0	2	1	1	1	1	1	1	1	0	1	1	1	1	0	0	1	1	0	0	0	0	1	2	0	0	0	0	0		0	0										0
1013	20	2	2	0	1	3	4	0	2	1	1	0	0	1	0	0	0	0	0	0	0	0	0	1	0	0	0	0	0	1	1	1	1	1	0	0		0	1	1	0								1
1014	27	2	10	0	1	1	4	0	1	1	1	0	1	1	0	0	0	0	0	0	1	0	0	0	0	0	0	0	0	1	1	1	1	1	1	0		0											0
1015	22	2	6	0	1	1	1	2	2	1	1	0	1	1	1	1	0	1	1	1	1	0	0	1	1	0	0	0	0	1	2	0	0	0	0	0		0	0										1
1016	31	2	11	0	1	3	3	1	2	1	1	1	1	1	1	1	0	1	1	0	1	0	0	0	1	0	0	0	0	1	2	0	1	1	1	0		1	1	5	0								0
1017	26	2	8	0	1	1	4	0	2	1	1	1	1	1	1	1	0	1	1	1	1	0	0	0	1	0	0	0	0	0	2	0	1	0	1	0		0	0										0
1018	30	2	8	0	1	1	4	0	2	0	1	1	1	1	0	0	0	0	1	1	1	0	0	0	1	0	0	0	0	0	1	0	0	0	0	0		0	1	1	0								1
1019	28	2	7	0	1	3	6	0	1	1	1	1	1	1	1	1	1	1	1	1	1	1	1	1	1	1	0	0	0	1	2	0	1	0	1	0		0	1	3	0								0
1020	35	2	12	0	1	3	5	0	2	1	1	1	1	1	1	1	1	1	1	1	1	0	0	0	1	0	0	0	0	1	2	1	1	0	0	0		0	0										1
1021	41	2	23	0	1	3	5	0	1	1	1	1	1	1	1	1	1	1	1	1	1	1	0	0	1	1	0	0	0	0	2	0	0	0	0	0			0										0
1022	25	2	4	0	1	3	4	0	2	1	1	1	1	1	1	1	1	1	1	1	1	1	1	1	1	0	0	0	0	0	2	1	1	1	1	0		1	1	5	0								0
1023	37	2	14	0	1	3	6	0	2	1	1	1	1	1	1	1	1	1	1	1	1	1	1	1	1	1	0	0	0	0	2	1	1	0	0	0		0	1	4	0								0
1024	41	2	13	0	1	3	4	0	2	0	1	1	1	1	0	1	1	1	1	1	1	0	0	1	0	0	0	0	0	1	1	0	0	0	0	0		0	1	5	0								1
1025	32	1		0	1	3	4	0	4	1	1	1	1	1	1	1	0	1	1	1	1	1	0	0	1	0	0	0	0	1	2	1	1	1	0	0		0											1
1026	35	2	14	0	1	3	2	1	2	1	0	0	1	0	0	0	0	0	0	0	1	0	0	1	0	0	0	0	0	1	1	1	1	1	0	0		0	1	1	0								1
1027	30	2	8	0	1	1	1	2	1	1	1	1	0	1	0	0	0	0	0	0	1	0	0	0	1	0	0	0	0	1	1	0	0	0	0	0		0	0		0								1
1028	33	2	13	0	1	3	4	0	2	1	0	1	1	1	0	1	0	1	1	1	1	0	0	0	1	0	0	0	0	0	1	0	1	0	0	0		0	1	1	0								1
1029	30	2	10	0	1	1	2	1	2	1	1	1	1	1	0	1	0	0	1	0	1	0		1	1	0	0	0	0	1	1	0	0	0	0	0		0											1
1030	19	2	1	0	1	3	6	0	3	1	1	1	1	1	1	1	1	1	1		1	1	1	1	1	1	0	0	0	1		1	1	1	0	1	1	0	1	5	0								0
1031	25	2	7	0	1	3	4	0	2	1	1	1	1	1	1	1	0	1	1	0	1	0	1	1	1	0	0	0	0	1	2	0	0	0	0	0		0	0										0
1033	23	2	4	0	1	3	4	0	2	1	1	1	1	1	0	1	0	0	1	1	1	0	1	1	0	0	0	0	0	1	1	1	1	0	1	1	2	1	1	1	1	1	1	1	0	0	0	0	0
1034	35	2	10	0	1	3	4	0	2	0	0	1	1	1	1	1	0	1	1	1	1	0	0	1	1	0	0	0	0	1	2	1	1	0	0	0		0	1	1	0								0
1035	18	1		0	1	1	1	2	4	1	1	1	1	1	1	0	0	0	1	0	1	0	0	1	1	0	0	0	0	0	1	1	0	0	0			1	1	1	0								1
1036	35	2	17	0	1	1	1	2	2	1	1	0	1	0	0	0	0	0	1	1	0	0	0	1	0	0	0	0	0	0	1	0	0	0	0	0		0	0										1
1037	22	1		0	1	3	6	0	3	1	1	1	1	1	1	1	0	1	1	1	1	0	0	1	0	0	0	0	0	0	2	1	1	0	0			0	1	5	0								0
1038	44	2	25	0	1	3	5	0	2	1	1	1	1	1	1	1	0	1	1	1	1	0	0	1	0	0	0	0	0	0	2	1	1	0	0	0		0	1	5	0								0
1040	30	2	3	0	1	3	6	0	2	1	1	1	1	1	1	1	0	1	1	1	1	0	0	1	1	1	0	0	0	0	2	0	0	1	0	1	1	0	0										0
1041	24	2	4	0	1	3	4	0	1	1	1	1	1	1	1	1	1	1	1	1	1	0	0	1	1	0	0	0	0	0	2	0	0	0	0	0		0	0										0
1042	23	2	5	0	1	3	3	1	1	1	1	0	1	1	1	1	1	1	1	0	1	0	0	1	0	0	0	0	0	1	1	0	0	0	1	0		0	1	1	0								1
1043	32	2	5	1	1	3	4	0	2	1	1	1	1	1	1	1	0	1	1	1	1	0	1	1	1	0	0	0	0	0	2	1	0	0	0	1	2	0	0										0
1044	35	2	13	0	1	3	5	0	2	0	1	1	0	1	0	0	0	1	1	1	1	0	0	1	0	0	0	1	0	1	1	0	1	0	1	0		1	0		0								1
1045	44	2	24	0	1	3	4	0	2	0	0	0	0	0	0	0	0	0	1	0	0	0	0	1	0	0	0	0	0	1	1	1	0	0	0	0		0	0										1
1046	38	2	12	1	1	3	6	0	1	1	1	1	1	1	1	1	0	1	1	1	1	0	1	1	1	0	0	0	0	0	2	1	1	1	1	1	1	0	0										0
1047	35	2	10	0	1	4	6	0	1	1	1	1	1	1	1	1	0	1	1	1	1	0	0	1	1	1	0	0	0	1	2	1	1	1	0	1	1	0	0										0
1048	25	2	9	0	1	2	1	2	1	1	1	0	0	1	0	0	0	0	0	0	1	0	0	1	0	0	0	0	0	0	1	1	0	0	0	0		0	1	3	0								1
1049	30	2	7	0	1	3	5	0	2	1	1	1	1	1	1	1	0	1	1	0	1	0	0	0	1	0	0	0	0	0	2	0	1	1	0	1	3	0	0										0
1050	39	2	10	0	1	1	4	0	2	1	1	1	1	1	1	1	0	1	1	0	1	0	0	0	1	0	0	0	0	0	2	1	1	1	0	0		0	0										0
1051	28	2	9	0	1	3	4	0	2	1	1	0	1	1	0	1	0	1	1	1	1	0	0	1	1	0	0	0	0	1	1	1	0	0	0	0		0	1	2	0								1
1052	40	2	23	0	1	3	5	0	2	1	1	1	1	1	1	1	1	0	1	1	1	0	0	1	1	0	0	0	0	1	2	0	0	0	0	0		1	0										0
1053	35	2	18	0	1	3	1	2	2	0	0	0	1	1	0	1	0	0	1	0	1	0	0	1	0	0	0	0	0	0	1	1	1	1	0	1	4	1	1	1	0								1
1054	30	2	10	0	1	3	6	0	2	1	0	0	0	1	1	1	0	0	1	1	1	0	0	0	0	0	1	0	0	1	1	0	0	0	0	0		0	0										1
1055	26	2	8	0	1	3	2	1	2	0	1	1	1	1	0	0	0	0	0	0	1	0	0	0	0	0	0	0	0	0	1	1	1	1	0	1	4	0	1	1	0								1
1056	32	2	6	0	1	1	6	0	1	1	1	1	1	1	1	1	1	1	1	1	1	1	1	1	1	0	0	0	0	1	2	1	1	0	0	1	1	0	1	5	0								0
1057	43	2	30	0	1	1	4	0	2	1	1	1	1	1	1	1	1	1	1	1	1	0	1	0	1	0	0	0	0	1	2	1	1	0	0	1	4	0	1	2	1	1	1	1	0	0	0	0	0
1058	25	2	1	0	1	3	4	0	2	1	1	1	1	1	1	1	1	1	1	1	1	1	1	1	1	0	0	0	0	1	2	0	0	0	0	0		0	0										0
1059	20	2	2	1	1	1	3	1	2	1	1	1	0	0	0	0	0	0	1	0	1	0	0	1	0	0	0	0	0	1	1	0	0	0	0	0		0	0										0
1060	43	2	20	0	1	3	4	0	2	1	1	1	1	1	1	1	1	1	1	1	1	1	1	1	1	1	0	0	0	1	2	1	0	0	0	0		1	1	4	1	0	1	1	0	0	0	0	1
1061	36	2	13	0	1	3	6	0	2	1	1	1	1	1	1	1	0	1	1	1	1	1	0	1	1	0	0	0	0	1	2	1	0	0	0	0		0	1	1	0								0
1062	40	2	23	0	1	3	2	1	2	1	1	1	1	0	0	1	0	0	1	1	1	0	1	1	0	0	0	0	0	1	1	1	1	0	0	0		1	1	1	0								0
1063	29	2	9	0	1	1	4	0	2	1	1	1	1	1	0	1	1	1	1	0	1	0	1	1	1	0	0	0	1	1	1	1	1	1	0	0		0	1	1	0								1
1064	30	2	6	0	1	3	4	0	2	1	1	1	1	1	1	1	0	1	1	1	1	0	1	1	1	0	0	0	0	1	2	1	1	0	0	0		0	1	5	0								0
1065	22	2	4	0	2		1	2	2	0	0	0	1	0	0	1	1	0	0	0	1	0	0	1	0	0	0	0	0	0	1	1	1	0	0	0		0	1	2	0								1
1066	23	2	10	0	1	1	2	1	2	0	0	0	1	1	0	0	0	0	0	0	1	0	0	1	0	0	0	0	0	0	1	1	0	0	0	0		1	1	5	0								1
1067	45	2	24	0	1	3	3	1	2	1	1	1	1	1	0	1	0	1	1	1	1	0	0	1	0	0	0	0	0	1	1	0	0	0	0	0		1	0										1
1068	20	2	2	0	1	4	4	0	2	1	1	1	1	1	0	1	0	1	1	1	1	0	0	1	1	0	0	0	0	0	2	1	0	1	0	0		0	1	1	1	1	1	0	0	0	0	0	0
1069	22	1		0	1	1	3	1	3	0	1	0	0	0	0	1	0	0	1	1	0	0	0	1	0	0	0	0	0	1	1	1	1	0	0			1	1	5	1	1	1	1	0	0	0	0	0
1070	44	2	25	0	1	3	1	2	2	1	1	1	1	1	1	1	1	1	1	1	1	0	1	1	1	0	0	0	0	0	2	0	0	0	0	0		0	1	5	0								1
1071	37	2	14	0	1	3	4	0	2	1	1	1	1	0	1	1	0	1	1	1	1	0	0	1	0	0	0	0	0	1	1	0	0	0	0	0		0											0
1072	26	2	6	0	1	3	3	1	2	1	1	1	1	1	1	1	0	0	1	1	1	0	0	1	0	0	0	0	0	0	1	0	0	0	0	0		0	1	5	0								1
1073	45	2	23	0	1	3	5	0	2	1	1	1	1	1	1	1	0	1	1	1	1	0	0	1	1	0	0	0	0	0	2	1	0	0	0	1	1	0	1	1	0								1
1074	35	2	14	0	1	4	4	0	2	0	1	1	1	0	0	0	0	0	1	1	1	0	0	1	0	0	0	0	0	0	1	1	1	0	0	0		1	1	5	0								1
1075	26	2	1	0	1	3	6	0	2	1	1	1	1	1	1	1	0	1	1	1	1	0	0	0	1	0	0	0	0	1	2	1	0	1	0	0		1	1	5	0								0
1076	37	2	20	0	2		1	2	2	0	1	1	1	1	1	1	0	1	1	1	1	0	0	1	1	0	0	0	0	0	2	0	0	0	0	1	3	0	0										1
1077	28	2	8	0	1	3	5	0	2	1	1	1	1	1	1	1	1	1	1	1	1	0	0	1	1	0	0	0	0	1	2	0	0	0	0	1	3	0	0										1
1078	27	2	3	0	1	4	6	0	1	1	1	1	1	1	0	1	0	0	1	1	1	0	0	1	1	0	0	0	0	1	1	1	0	0	0	1	3	0	0										0
1079	32	2	14	0	1	3	4	0	2	1	1	1	1	1	0	1	1	1	0	0	1	0	0	1	0	0	0	0	0	1	1	1	0	0	0	1	4	0	0										1
1080	39	2	12	0	1	4	6	0	2	1	1	1	1	1	1	1	0	1	1	1	1	1	1	1	1	1	0	0	0	1	2	1	1	1	0	0		1	1	1	0								0
1081	32	2	11	0	1	4	5	0	2	1	1	1	1	1	1	1	0	1	1	1	1	0	0	1	1	0	0	0	0	1	2	1	1	0	0	0		0	1	1	0								1
1082	29	2	9	0	1	3	4	0	2	1	1	1	1	1	1	1	1	1	1	1	1	1	1	1	1	0	0	0	0	1	2	1	0	0	0	1	1	0	0										0
1083	40	2	18	0	1	3	6	0	2	1	1	1	1	1	1	1	1	1	1	1	1	1	1	1	1	1	0	0	0	1	2	1	1	0	0	0		0	0										0
1084	30	2	9	0	1	3	4	0	1	1	1	0	0	0	0	1	0	1	1	1	1	0	0	1	0	0	0	0	0	0	1	1	0	0	0	1	1	0	0										0
1085	30	2	11	0	1	1	4	0	2	1	1	1	1	1	0	1	1	1	1	1	1	0	1	1	1	0	0	0	0	0	2	0	0	0	0	1	4	0											1
1086	25	2	5	0	1	3	4	0	2	0	0	0	1	1	0	1	0	1	0	1	1	0	0	1	0	0	0	0	0	0	1	0	0	0	0	1	4	0	0										1
1087	26	2	6	0	1	1	3	1	2	0	0	0	1	0	0	1	1	0	1	1	1	0	0	1	0	0	0	0	0	0	1	0	0	0	0	1	4	0	0										1
1088	24	2	3	0	1	3	4	0	2	0	0	1	1	1	0	0	0	0	1	0	1	0	0	0	0	0	0	0	0	0	1	0	0	0	0	1	3	0	0										1
1089	36	2	13	0	1	3	1	2	2	0	0	0	1	0	0	1	0	0	1	0	1	0	0	1	0	0	0	0	0	0	1	1	0	1	0	0		0	1	2	0								1
1090	30	2	8	0	1	3	1	2	1	1	1	0	1	0	0	1	0	0	1	1	1	0	0	1	0	0	0	0	0	0	1	1	0	0	0	0		0	0										1
1091	30	2	11	0	1	3	4	0	2	1	0	0	1	0	0	1	0	0	1	0	1	0	0	1	0	0	0	0	0	0	1	1	1	1	0	1	1	1	1	1	0								1
1092	24	2	7	0	1	3	5	0	2	1	1	1	1	1	1	1	0	1	1	1	1	0	0	1	1	0	0	0	0	0	2	1	0	0	0	1	2	0	0										0
1093	30	2	8	0	1	1	1	2	2	0	1	0	1	0	0	0	0	0	1	1	1	0	0	1	0	0	0	0	0	1	1	0	0	0	0	1	4	0	0										1
1094	25	2	5	0	1	1	1	2	2	0	0	0	1	0	0	0	0	0	1	0	1	0	0	1	0	0	0	0	0	0	1	0	0	0	0	1	4	0	1	2									1
1095	20	1			1	2	5	0	3	1	1	1	1	1	1	1	0	1	1	1	1	0	0	1	1	0	0	0	0	1	2	1	0	0	0			0	1	2	0								0
1096	26	2	9	0	1	3	4	0	2	0	1	0	1	0	0	1	0	0	1	1	1	0	0	1	0	0	1	0	0	1	1	1	0	0	0	1	4	0	1	5	0								1
1097	26	2	13	0	1	1	2	1	2	1	1	0	1	1	0	0	0	0	1	1	1	0	0	0	1	0	0	0	0	0	1	0	0	0	0	0		0	0										1
1098	29	2	12	0	1	3	4	0	1	0	0	0	1	0	0	0	0	0	1	0	1	0	0	1	0	0	0	0	0	0	1	1	1	1	0	0		1	1	1	0								1
1099	38	2	18	0	1	3	4	0	2	1	0	0	1	0	0	0	0	0	1	1	1	0	0	1	1	0	0	0	0	1	1	0	0	0	0	1	4	0	0										1
1100	19	1			1	3	4	0	1	1	1	0	1	0	0	0	0	0	1	1	1	0	0	1	0	0	0	0	0	0	1	0	0	0	0			0	0										1
1101	30	2	7	0	1	1	1	2	1	0	0	0	0	0	0	0	0	0	1	0	1	0	0	1	0	0	0	0	0	0	1	1	1	1	0	0		0	1	1	0								1
1102	24	2	6	0	1	3	4	0	2	1	1	1	1	0	0	1	1	1	1	1	1	0	0	1	0	0	0	0	0	0	1	1	0	0	0	1	2	0	1	1	0								0
1103	28	2	10	0	1	3	4	0	2	1	1	1	1	1	1	1	0	1	1	1	1	0	0	1	1	0	0	0	0	1	2	0	0	0	0	1	4	0	0										1
1104	33	2	5	0	1	3	5	0	2	1	1	1	1	1	1	1	1	1	1	1	1	1	1	1	1	1	0	0	0	0	2	0	0	0	0	0		0	0										0
1105	30	2	6	0	1	1	2	1	1	0	1	0	1	0	0	0	0	0	1	1	1	0	0	1	0	0	0	0	0	0	1	1	0	0	0	1	4	0	0										1
1106	25	2	5	0	1	4	2	1	2	1	1	1	1	1	0	0	0	0	1	1	1	0	0	1	0	0	0	0	0	0	1	0	0	0	0	1	4	0	0										1
1107	25	2	5	0	1	1	4	0	2	1	1	1	1	1	0	0	0	0	0	1	1	0	0	1	0	0	0	0	0	0	1	0	0	0	0	1	4	0	0										1
1108	25	2	7	0	1	1	4	0	1	0	1	0	0	0	0	0	0	0	1	0	1	0	0	1	0	0	0	0	0	0	1	0	0	0	0	0		0	0										1
1109	30	2	5	0	1	1	1	2	1	0	1	1	1	0	0	0	0	0	1	1	1	0	0	1	0	0	0	0	0	0	1	0	0	0	0	0		0	0										1
1110	45	2	25	0	1	1	6	0	2	1	1	1	1	1	1	1	1	1	1	1	1	1	1	1	1	0	0	0	0	1	2	0	0	0	0	0		0	0										1
1111	27	2	8	0	1	3	4	0	2	1	1	1	1	1	1	1	1	1	1	1	1	0	1	1	1	0	0	0	0	1	2	1	1	0	0	0		0	1	5	0								0
1112	40	2	20	0	1	3	3	1	2	0	1	0	1	0	0	0	0	0	1	0	1	0	0	1	0	0	0	0	0	1	1	1	0	0	0	0		0	0										1
1113	45	2	30	0	1	3	4	0	2	0	0	0	1	0	0	0	0	0	1	1	1	0	0	1	0	0	0	0	0	1	1	0	0	0	0	0		0	0										1
1114	20	2	2	0	1	3	4	0	2	1	1	1	1	1	0	0	0	1	1	1	1	0	0	1	1	0	0	0	0	0	1	0	0	0	0	0		0	0										1
1115	26	2	5	0	1	3	4	0	2	1	1	1	1	1	1	1	0	1	1	1	1	1	1	1	1	0	0	0	0	1	2	0	0	1	0	0		0	0										1
1116	26	2	1	0	1	4	6	0	1	1	1	1	1	1	1	1	1	1	1	1	1	0	0	0	1	0	0	0	0	0	2	1	1	1	0	0		1	0										0
1117	38	2	22	0	1	3	4	0	2	0	1	0	1	0	0	1	0	0	1	1	1	0	0	1	0	0	0	0	0	1	1	1	1	1	0	0		1	1	1	0								1
1118	21	1			1	3	4	0	1	0	1	1	1	0	0	0	0	0	1	1	1	0	0	1	0	0	0	0	0	0	1	0	0	0	0			0	0										0
1119	33	2	7	0	1	3	6	0	2	1	1	1	1	1	1	1	1	1	1	1	1	1	1	1	1	0	0	0	0	0	2	0	0	0	0	1	2	0	0										0
1120	27	2	8	0	1	3	3	1	2	1	1	1	1	0	0	1	0	1	1	1	1	0	0	1	1	0	0	0	0	0	1	0	0	0	0	0		0	0										1
1121	35	2	15	0	1	1	1	2	1	0	0	0	1	0	0	0	0	0	1	1	1	0	0	1	0	0	0	0	0	0	1	0	0	0	0	0		0	0										1
1122	33	2	13	0	1	3	2	1	2	1	0	1	1	0	0	0	0	0	1	1	1	0	0	1	0	0	1	0	0	1	1	0	1	0	0	0		0	0										1
1123	30	2	8	0	1	3	4	0	1	0	0	0	1	0	0	1	0	0	1	1	1	0	0	1	0	0	0	0	0	1	1	0	0	0	0	1	3	0	0										1
1124	35	2	20	0	1	3	2	1	2	1	0	1	1	1	0	1	1	1	1	1	1	0	0	0	0	0	0	0	0	0	1	0	0	0	0	0		0	0										1
1125	25	2	6	0	1	3	4	0	2	1	1	1	1	1	0	0	0	1	1	1	1	0	0	1	0	0	0	0	0	1	1	0	0	0	0	0		0	0										1
1126	24	2	6	0	1	3	3	1	2	1	1	1	1	1	1	1	1	1	1	1	1	0	0	1	1	0	0	0	0	0	2	0	0	0	0	0		0	0										1
1127	25	2	5	0	1	3	6	0	2	1	1	1	1	1	0	0	1	1	0	1	1	0	0	0	0	0	0	0	0	0	1	0	0	0	0	1	3	0	0										0
1128	28	2	6	0	1	1	4	0	2	1	1	1	1	1	1	1	0	1	1	1	1	1	1	1	1	0	0	0	0	1	2	0	0	0	0	0		0	0										1
1129	25	2	7	1	1	3	1	2	2	1	1	1	1	1	1	1	0	1	1	1	1	0	0	1	1	0	0	0	0	0	2	1	0	0	0	0		0	0										0
1130	25	2	8	0	1	1	4	0	2	1	1	1	1	1	0	0	0	0	1	1	1	0	0	1	0	0	0	0	0	0	1	0	1	1	0	0		0	0										1
1131	25	2	7	0	1	1	1	2	2	1	1	0	1	0	0	0	0	0	1	1	0	0	0	1	0	0	0	0	0	0	1	0	0	0	0	1	2	0	0										1
1132	37	2	15	0	1	3	4	0	2	1	1	1	1	1	1	0	1	1	1	1	1	0	0	1	1	0	0	0	0	1	2	0	0	0	0	1	2	0	0										1
1133	19	1			1	3	5	0	3	1	1	1	1	1	1	1	1	1	1	1	1	0	1	1	1	0	0	0	0	0	2	0	0	0	0			0	0										1
1134	34	2	13	1	1	3	4	0	2	1	1	1	1	1	0	0	0	0	1	1	1	0	0	1	0	0	0	0	0	0	1	0	0	0	0	1	4	0	0										1
1135	45	2	30	0	1	3	2	1	2	0	1	1	1	1	0	0	0	0	1	1	1	0	0	1	0	0	0	0	0	1	1	1	1	1	0	0		0	0										1
1136	43	2	24	0	1	1	1	2	1	1	1	1	1	1	0	0	0	0	1	1	1	0	0	1	0	0	0	0	0	1	1	0	0	0	0	0		0											1
1137	26	2	6	0	1	3	2	1	2	1	1	1	1	0	0	1	0	0	1	0	1	0	0	1	0	0	0	0	0	1	1	0	1	1	0	0		0	0										1
1138	25	2	6	0	2		1	2	2	1	1	1	1	1	0	1	0	0	1	1	1	0	1	1	1	0	0	0	0	0	1	0	1	0	0	0		0	0										1
1139	25	2	7	0	4		2	1	2	0	1	0	1	1	0	0	0	0	1	1	1	0	0	1	0	0	0	0	0	0	1	0	1	0	0	0		0	0										1
1140	25	2	8	0	4		3	1	2	1	1	1	1	0	0	0	0	0	1	1	1	0	0	1	1	0	0	0	0	0	1	0	0	0	0	0		0	0										0
1141	24	2	3	0	4		2	1	1	1	0	0	1	1	0	0	0	0	1	1	1	0	0	1	1	0	0	0	0	0	1	0	0	0	0	0		0	0										0
1142	30	2	12	0	1	4	4	0	2	1	1	1	1	1	0	1	0	1	1	1	1	0	0	1	1	1	1	0	0	1	2	0	1	0	0	0		0	0										1
1143	27	2	12	0	1	4	4	0	2	1	1	1	1	1	0	1	1	1	1	1	1	0	0	0	0	0	0	0	0	0	1	0	0	0	0	0		0	0										0
1144	27	2	12	0	1	4	4	0	1	1	0	1	1	1	0	0	0	0	1	1	1	0	0	0	0	0	0	0	0	1	1	0	1	0	0	0		0	0										1
1145	28	2	7	0	1	3	4	0	2	1	1	1	1	1	1	1	0	1	1	1	1	1	1	1	0	0	0	0	0	1	2	0	1	1	0	0		0	0										1
1146	37	2	18	0	1	4	5	0	2	1	1	1	1	1	1	1	0	1	1	1	1	1	1	1	0	0	0	0	0	1	2	0	0	0	0	1	3	0	0										0
1147	30	2	13	0	1	4	4	0	2	1	1	1	1	1	0	1	0	1	1	1	1	0	0	1	1	0	0	0	0	1	2	0	1	1	0	1	3	0	0										1
1148	42	2	22	0	1	4	4	0	2	0	0	0	1	0	0	0	0	0	0	1	1	0	0	1	0	0	0	0	0	0	1	0	0	0	0	1	3	0	0										1
1149	30	2	12	0	4		1	2	2	0	0	0	1	0	0	0	0	0	1	1	1	0	0	1	0	0	0	0	0	0	1	1	1	0	1	0		0											1
1150	21	3	1		1	3	6	0	3	1	1	1	1	1	1	1	1	1	1	1	1	1	1	1	1	0	0	0	0	1	2	0	1	0	0	0		0											1
1151	29	2	11	0	1	3	4	0	2	1	1	1	1	0	0	1	1	0	1	1	1	0	1	1	0	0	0	0	0	1	1	1	1	1	0	0		0	0										1
1152	18	1			1	3	4	0	3	1	0	0	0	0	0	1	1	0	1	1	1	0	0	1	0	0	0	0	0	1	1	1	1	0	0	0		0											1
1153	23	1			1	3	6	0	4	1	1	1	1	0	0	0	0	0	1	1	1	0	0	1	0	0	0	0	0	0	1	0	0	0	0	0		0	0										0
1154	23	2	1	0	1	4	4	0	2	0	1	1	1	1	0	0	0	0	0	1	1	0	0	1	1	0	0	0	0	1	1	0	0	0	0	0		0	0										1
1155	21	2	1	0	3		4	0	2	1	1	1	1	1	1	1	1	1	1	1	1	0	0	1	0	0	0	0	0	1	2	0	0	0	0	0		0	0										0
1156	33	2	10	0	1	4	6	0	2	1	1	1	1	1	1	1	1	1	1	1	1	0	0	1	1	0	0	0	0	1	2	1	1	1	0	0		0	0										0
1157	35	2	18	0	1	4	4	0	2	1	1	1	1	1	0	1	1	1	1	1	1	0	0	1	1	0	0	0	0	0	2	0	1	1	0	0		1	0										0
1158	35	2	8	0	1	4	4	0	2	1	1	1	1	1	0	0	0	1	1	1	1	0	0	1	1	0	0	0	0	0	1	0	0	0	0	0		0	0										1
1159	27	2	5	0	4		1	2	2	1	1	1	1	0	0	1	0	0	1	1	1	0	0	1	1	0	0	0	0	1	1	0	1	0	0	0		0	0										1
1160	30	2	12	0	1	4	1	2	2	1	1	1	1	0	0	0	0	1	1	1	1	0	0	1	1	0	0	0	0	0	1	0	1	1	0	0		0	0										1
1161	27	2	5	0	1	1	3	1	2	0	1	1	1	0	0	0	0	1	1	1	1	0	0	1	0	0	0	0	0	0	1	0	0	0	0	1	4	1	0										1
1162	27	2	6	0	1	3	4	0	2	1	1	1	1	1	0	0	0	1	1	1	1	0	0	1	1	0	0	0	0	0	1	0	1	1	0	1	4	0	0										1
1163	36	2	21	0	1	3	4	0	1	1	1	1	1	1	1	1	0	1	1	1	1	0	0	1	1	0	0	0	0	0	2	0	0	0	0	1	4	0	0										0
1164	30	2	12	0	1	3	3	1	1	1	1	1	1	1	0	1	0	1	1	1	1	0	0	1	1	0	0	0	0	1	2	0	0	0	0	1	4	0	0										1
1165	22	1			1	4	5	0	3	1	1	1	1	1	1	1	0	1	1	1	1	0	0	1	1	0	0	0	0	0	2	0	0	0	0			0	1	1	1	1	0	0	0	0	0	0	0
1166	30	2	7	0	1	3	5	0	2	1	1	1	1	1	0	1	1	1	1	1	1	0	1	1	0	0	0	0	0	1	1	0	1	1	0	0		0	0										1
1167	35	2	20	0	1	2	1	2	1	1	1	1	1	1	0	1	0	0	1	1	1	0	0	1	0	0	0	0	0	0	1	1	1	0	0	1	4	0	0										1
1168	45	2	24	0	1	3	4	0	2	1	1	1	1	1	1	1	1	1	1	1	1	0	0	1	1	0	1	0	0	1	2	1	1	1	0	0		0	1	2	0								1
1169	35	2	17	0	1	1	2	1	2	1	1	1	1	1	0	0	0	1	1	1	1	0	1	1	0	0	0	0	0	0	1	1	1	1	0	1	2	1	1	1	0								1
1170	26	2	1	0	4		4	0	2	1	1	1	1	1	1	1	1	1	1	1	1	0	0	1	1	0	0	0	0	0	2	0	0	1	0	1	1	1	0										0
1171	42	2	21	0	1	3	4	0	2	1	1	1	1	1	0	1	0	1	1	1	1	0	0	1	1	0	0	1	0	0	2	0	1	0	0	1	4	0	0										1
1172	25	2	8	0	4		1	2	1	0	1	1	1	1	0	0	0	1	1	1	1	0	1	1	0	0	0	0	0	1	1	1	0	0	0	1	1	1	1	1	0								1
1173	18	1		0	1	4	5	0	3	1	1	1	1	1	1	1	0	1	1	1	1	0	0	1	1	0	1	0	0	1	2	0	0	0	0			1	1	5	1	1	1	1	0	0	0	0	0
1174	32	2	17	0	1	4	2	1	2	1	1	1	1	1	0	1	0	1	1	1	1	0	0	1	1	0	0	0	0	1	2	0	0	0	0	0		1	1	1	1	1	1	1	0	0	0	0	0
1175	20	1		0	1	4	5	0	3	1	1	1	1	1	1	1	1	0	1	1	1	0	0	1	1	0	0	0	0	1	2	0	0	0	0			0	1	4	1	1	0	0	0	0	0	0	0
1176	35	2	14	0	1	4	2	1	2	1	1	1	1	1	0	1	0	1	1	0	1	0	0	1	0	0	0	0	0	1	1	0	1	1	0	0		0	0										1
1177	25	2	5	0	1	1	2	1	1	0	0	0	1	0	0	1	0	0	1	1	0	0	0	1	0	0	0	0	0	1	1	0	0	0	0	0		1	1	1	0								0
1178	27	2	10	0	1	3	2	1	2	1	1	1	1	1	0	1	0	0	1	1	1	0	0	1	0	0	0	0	0	1	1	1	1	0	0	0		1	1	1	0								0
1179	29	2	11	0	1	4	4	0	2	1	1	1	1	1	1	1	1	1	1	1	1	0	0	1	1	0	0	0	0	0	2	0	0	0	0	0		0											0
1180	38	2	14	0	1	3	5	0	2	1	1	1	1	1	1	1	1	1	1	1	1	0	1	1	1	0	0	0	0	0	2	0	1	1	1	0		1	1	3	1	1	1	0	0	0	0	0	1
1181	35	2	20	0	1	2	1	2	1	0	0	0	1	0	0	1	0	0	1	1	1	0	0	1	0	0	0	0	0	0	1	1	0	1	0	0		0	0										1
1182	40	2	18	0	1	3	2	1	2	1	1	1	1	1	1	1	0	1	1	1	1	0	0	1	1	0	0	0	0	1	2	1	1	0	0	0		0	0										1
1183	45	2	27	0	1	3	1	2	2	0	0	1	1	0	0	1	0	0	1	1	1	0	0	1	0	0	0	0	0	1	1	1	0	0	0	1	4	0	0										1
1184	21	1		0	1	4	6	0	3	1	0	1	1	1	0	1	0	0	1	1	1	0	0	1	0	0	0	0	0	1	1	0	0	0	0			0	0										0
1185	26	2	7	0	1	3	4	0	2	1	0	0	0	0	0	0	0	0	0	0	0	0	0	0	0	0	1	0	0	1	1	0	1	0	1	1	3	0	0										0
1186	23	1			1	4	6	0	4	0	0	0	1	0	0	0	0	0	1	1	1	0	0	1	0	0	0	0	0	1	1	1	0	1	1			0	0										0
1187	20	2	3	0	1	3	4	0	2	1	1	1	1	0	0	1	0	0	1	1	1	0	0	1	0	0	0	0	0	1	1	1	1	0	0	1	3	0	1	1	0								1
1188	24	2	4	0	1	4	6	0	3	1	1	1	1	1	1	1	0	1	1	1	1	0	0	1	1	0	0	0	0	0	2	1	1	0	0	1	1	1	1	1	0								0
1189	26	2	4	0	3		5	0	2	1	1	1	1	1	0	1	0	1	1	1	1	0	0	1	1	0	0	0	0	0	2	1	1	1	1	0		0	1	4	0								1
1190	32	2	22	0	1	4	4	0	2	1	1	1	1	1	1	1	0	1	1	1	1	0	1	1	1	0	0	0	0	0	2	1	1	1	0	0		0	0										1
1191	30	2	15	0	1	3	4	0	2	1	1	1	1	1	1	1	1	1	1	1	1	0	0	1	1	0	0	0	0	1	2	1	1	0	1	0		0	1	5	0								1
1192	40	2	20	0	2		6	0	1	1	1	1	1	1	0	1	0	1	1	1	1	0	0	1	1	0	0	0	0	1	2	1	1	0	1	0		0	0										1
1193	29	2	10	0	1	3	4	0	2	0	1	1	1	1	0	1	1	1	1	1	1	0	0	1	0	0	0	0	0	1	1	0	0	0	0	0		0	0										0
1194	27	2	10	0	1	4	4	0	2	1	1	1	1	1	0	1	0	1	1	1	1	0	0	1	1	0	0	0	0	0	2	0	1	0	0	1	4	0	0										1
1195	19	1			1	3	5	0	3	1	1	1	1	1	0	1	1	1	1	1	1	0	0	1	1	0	0	0	0	1	2	0	0	0	0			0	0										0
1196	38	2	20	0	1	1	2	1	2	1	1	0	1	1	0	1	1	1	1	1	1	0	0	1	0	0	0	0	0	1	1	0	1	1	0	0		0	1	1	0								1
1197	26	2	3	0	1	3	6	0	1	1	1	1	1	1	1	1	1	1	1	1	1	0	0	1	1	0	0	0	0	1	2	1	1	0	0	1	1	0	0										1
1198	30	2	12	0	1	1	4	0	2	1	1	0	1	1	0	1	0	1	1	1	1	0	0	1	0	0	0	0	0	0	1	0	1	0	0	1	4	0											1
1199	32	2	13	0	1	3	1	2	2	1	1	1	1	1	1	1	0	1	1	1	1	0	0	1	1	0	0	0	0	0	2	0	1	1	0	0		0	0										1
1200	32	2	10	0	1	3	4	0	2	1	1	1	1	0	0	1	1	0	1	1	1	0	0	1	0	0	0	0	0	1	1	1	1	0	0	0		0											1
1201	28	2	4	0	1	3	4	0	2	1	1	1	1	1	0	1	1	1	1	1	1	0	0	1	1	0	0	0	0	1	2	0	0	0	0	1	2	0	0										0
1202	40	1		0	1	4	2	1	4	1	1	1	1	1	0	0	0	0	1	1	1	0	0	1	0	0	0	0	0	0	1	0	0	0	0			1	1	5	0								1
1203	30	2	3	0	1	4	5	0	2	1	1	1	1	1	0	1	1	1	1	1	1	0	0	1	1	0	0	0	0	1	2	0	0	0	0	0		0	1	5	0								0
1204	25	1	25	0	1	3	4	0	3	1	1	1	1	1	0	0	0	0	1	1	1	0	0	1	1	0	0	0	0	0	1	1	1	0	0			1	1	5	1	1	1	1	0	0	0	0	0
1205	28	2	10	0	1	3	4	0	1	1	1	1	1	1	0	0	0	0	1	1	1	0	0	1	0	0	0	0	0	0	1	1	1	0	1	1	3	0	0										1
1206	41	2	14	0	1	4	6	0	1	1	1	1	1	1	1	1	1	1	1	1	1	0	1	1	1	0	0	0	0	1	2	0	0	0	0	0		0	1	1	0								0
1207	35	2	17	0	1	3	2	1	2	1	1	1	1	1	0	0	0	1	1	1	1	0	0	1	1	0	0	0	0	1	1	1	1	0	0	0		0	1	3	0								0
1208	44	2	22	0	1	3	6	0	2	1	1	1	1	1	1	1	0	1	1	1	1	0	1	1	1	0	0	0	0	1	2	1	1	1	0	1	3	1	1	5	1	0	1	1	0	0	0	0	0
1209	24	1		0	1	4	6	0	3	1	1	1	1	1	1	1	1	1	1	1	1	1	1	1	1	1	0	0	0	1	2	0	0	0	0			0	0										0
1210	37	2	19	0	1	3	4	0	2	1	0	1	1	1	0	0	0	1	1	1	1	0	0	1	1	0	0	0	0	1	1	0	0	0	0	1	4	0	0										1
1211	32	2	10	0	1	4	6	0	2	1	1	1	1	1	0	1	0	1	1	1	1	0	0	1	0	0	0	0	0	0	1	1	1	1	0	0		0	1	3	1	0	1	1	1	0	0	0	1
1212	18	1		0	2		4	0	4	0	0	1	1	1	0	1	0	0	1	1	1	0	0	1	0	0	0	0	0	0	1	1	1	0	0			0	0										1
1213	20	1		0	1	3	4	0	4	1	1	1	1	1	0	1	0	1	1	1	1	0	0	1	1	0	0	0	0	0	2	1	1	1	0			1	1	5	1	1	0	0	0	0	0	0	0
1214	43	2	22	0	1	1	4	0	2	1	0	1	1	0	0	0	0	0	1	1	1	0	0	0	0	0	0	0	0	0	1	1	1	0	0	0		0	0										1
1215	42	2	12	0	1	3	2	1	2	1	1	1	1	1	0	1	1	1	1	1	1	0	1	1	1	0	0	0	1	1	2	0	0	0	0	0		0	0										0
1216	45	2	30	0	1	1	2	1	2	1	0	1	1	1	0	1	0	0	1	1	1	0	0	1	0	0	0	0	0	1	1	0	0	0	0	1	4	1	0										1
1217	44	2	21	0	1	3	3	1	2	1	0	0	1	0	0	0	0	0	1	1	1	0	0	1	0	0	0	0	0	1	1	0	0	0	0	0		0	0										1
1218	26	2	6	0	1	1	4	0	2	1	1	1	1	1	0	1	0	0	1	1	1	0	0	0	0	0	0	0	0	1	1	0	0	0	0	1	1	0	0										1
1219	22	2	5	0	1	3	4	0	2	1	0	0	1	0	0	1	1	0	1	1	1	0	0	1	1	0	0	0	0	1	1	0	0	0	0	0		0	0										1
1220	21	2	4	0	1	4	4	0	2	1	1	1	1	1	0	1	0	1	1	1	1	0	0	1	0	0	0	0	0	1	1	0	0	0	0	1	3	0	0										1
1221	33	2	13	0	1	3	5	0	2	1	1	1	1	0	0	1	1	1	1	1	1	0	0	1	0	0	0	0	0	1	1	0	0	0	0	0		0	0										1
1222	27	2	6	0	1	3	4	0	2	1	0	0	1	1	0	0	0	1	1	1	1	0	0	1	1	0	0	0	0	0	1	0	0	0	0	0		0	0										1
1223	28	2	11	0	1	3	4	0	2	0	0	0	1	0	0	1	0	0	1	1	1	0	0	1	0	0	0	0	0	0	1	0	0	0	1	1	4	0	0										1
1224	24	2	3	0	1	3	4	0	1	1	1	1	1	1	0	1	0	0	1	1	1	0	0	1	0	0	0	0	0	0	1	1	0	1	0	0		0	0										1
1225	45	2	24	0	1	3	3	1	2	1	1	1	1	1	0	0	0	0	1	1	1	0	0	0	0	0	0	0	0	1	1	0	0	0	0	1	4	0	0										1
1226	38	2	20	0	1	4	1	2	2	1	0	0	1	1	0	0	0	0	1	1	1	0	0	1	0	0	0	0	0	0	1	0	0	0	0	0		0	0										1
1227	44	2	22	0	1	4	2	1	2	1	0	0	1	0	0	1	0	1	1	1	1	0	0	0	1	0	0	0	0	1	1	1	1	0	1	0		1	1	2	0								1
1228	42	2	25	0	1	3	2	1	2	1	1	1	1	1	1	0	1	1	1	1	1	0	0	1	1	0	1	0	0	0	2	1	1	1	0	0		0	1	2	1	0	0	1	1	0	0	0	1
1229	40	2	19	0	1	3	4	0	2	0	0	0	0	0	0	1	0	0	1	1	1	0	0	1	0	0	0	0	0	1	1	0	0	0	0	1	4	0	0										0
1230	25	1		0	1	4	6	0	1	1	1	1	1	1	1	1	1	1	1	1	1	0	1	1	1	0	0	0	0	1	2	0	1	1	0			1	1	3	0								0
1231	23	1			1	4	6	0	3	1	0	1	1	1	1	1	0	1	1	1	1	0	0	1	1	0	0	0	1	1	2	0	0	0	0			0	0										0
1232	22	2	3	0	1	1	2	1	2	0	0	0	1	1	0	0	0	0	0	0	0	0	0	1	0	0	0	0	0	0	1	1	1	1	0	1	4	0	0										0
1233	34	2	10	0	4		2	1	1	0	0	0	1	0	0	0	0	0	1	1	1	0	0	1	0	0	0	0	0	0	1	0	0	0	0	0		0	0										1
1234	24	1		0	1	3	6	0	3	1	1	1	1	1	1	1	1	1	1	1	1	0	1	1	0	0	0	0	0	1	2	0	0	0	0			0	0										0
1235	38	2	14	0	1	4	6	0	2	1	1	1	1	1	1	1	0	1	1	1	1	1	0	1	1	1	0	0	0	0	2	0	0	0	0	1	4	0	0										0
1236	28	2	11	0	1	4	4	0	2	1	1	1	1	1	1	1	0	1	1	1	1	0	0	1	1	0	0	0	0	0	2	1	1	0	1	0		0	0										1
1237	35	2	15	0	1	2	5	0	2	1	1	1	0	1	1	1	0	1	1	1	1	0	0	1	1	0	0	0	0	0	2	0	0	0	0	1	2	0	0										1
1238	18	1			2		4	0	3	1	1	1	1	1	1	1	0	1	1	1	1	1	0	1	1	0	0	0	0	0	2	0	0	0	0			0	0										1
1239	45	2	19	0	3		5	0	2	1	1	1	1	1	1	1	1	1	1	1	1	1	0	1	1	1	0	0	0	1	2	0	0	0	0	1	4	1	1	5	0								0
1240	33	2	14	0	1	2	6	0	2	1	1	1	1	1	1	1	0	1	1	1	1	1	0	1	1	1	0	0	0	1	2	0	0	0	0	1	1	0	0										0
1241	25	2	8	0	1	3	4	0	2	1	1	1	1	1	1	1	0	1	1	1	1	1	0	1	1	0	0	0	0	0	2	0	0	0	0	1	2	0	0										0
1242	22	1			1	3	6	0	3	1	1	1	1	1	1	1	0	1	1	1	1	0	0	1	1	0	0	0	0	0	2	0	0	0	0			0	0										0
1243	24	2	1	0	1	1	6	0	1	1	1	1	1	1	1	1	0	1	1	1	1	1	0	1	1	0	0	0	0	0	2	0	0	0	0	0		0	0										0
1244	35	2	7	0	1	4	6	0	2	1	1	1	1	1	1	1	0	1	1	1	1	1	0	1	1	1	0	0	0	1	2	1	1	1	0	0		0	0										1
1245	40	2		0	2		1	2	2	1	1	1	1	1	0	1	0	1	1	1	1	0	0	1	1	0	0	0	0	0	2	0	0	0	0	0		0											0
1246	30	2	9	0	1	1	4	0	2	1	1	1	1	1	1	1	0	1	1	1	1	0	1	1	1	0	0	0	0	0	2	0	0	0	0	1	1	0	0										0
1247	44	2	20	0	2		4	0	2	1	1	1	1	1	1	1	1	1	1	1	1	0	1	0	1	1	1	0	0	1	2	1	1	0	1	0		0	0										1
1248	21	1			1	4	6	0	3	1	1	0	1	0	0	1	0	1	1	1	1	0	0	0	0	0	0	0	0	0	1	0	0	0	0			0	0										0
1249	38	2	22	0	2		3	1	2	1	1	1	1	1	1	1	0	1	1	1	1	0	0	1	1	0	0	0	0	0	2	1	1	1	0	0		0											1
2001	40	2	20	0	1	4	6	0	2	1	1	1	1	1	1	1	0	1	1	1	1	0	0	1	1	0	0	0	0	1	2	0	0	0	0	1	2	0	0										0
2002	26	1		0	1	4	6	0	1	1	1	1	1	1	1	1	1	1	1	1	1	1	1	1	1	1	0	0	0	0	2	0	0	0	0	0		0	1	5	0								0
2003	33	2	14	0	1	4	6	0	2	1	1	1	1	1	1	1	0	1	1	1	1	0	0	1	1	0	0	0	0	1	2	0	0	0	0	1	4	0	0										0
2004	34	2	12	0	1	4	6	0	2	1	1	1	1	1	1	1	1	1	1	1	1	1	0	1	1	0	0	0	0	1	2	0	0	0	0	1	3	0	0										0
2005	40	2	11	0	1	4	6	0	2	1	1	1	1	1	1	1	0	1	1	1	1	1	0	1	1	0	0	0	0	0	2	0	0	0	0	0		0	0										0
2006	38	2	18	0	1	2	4	0	2	1	1	1	1	1	1	1	0	1	1	1	1	1	0	1	1	0	0	0	0	1	2	1	1	1	0	1	4	0	0										1
2007	27	2	2	0	3		6	0	1	1	1	1	1	1	1	1	0	1	1	1	1	0	0	0	1	1	0	0	0	0	2	0	0	0	0	0		0	0										0
2008	38	2	15	0	1	2	5	0	2	1	0	1	1	1	1	1	0	1	1	1	1	0	0	0	1	0	0	0	0	1	2	1	0	0	0	1	4	0	1	2	0								1
2009	37	2	18	0	1	1	5	0	2	1	1	1	1	1	1	1	0	1	1	1	1	0	0	1	1	1	0	0	0	1	2	1	0	0	0	0		0	1	5	0								0
2010	28	2	5	0	1	3	6	0	2	1	1	1	1	1	1	1	1	1	1	1	1	0	0	1	1	1	0	0	0	0	2	1	1	1	0	1	3	1	1	2	0								0
2011	40	2	15	0	1	4	6	0	2	1	1	1	1	1	1	1	0	1	1	1	1	0	0	1	1	0	0	0	0	0	2	0	0	0	0	1	4	0	1	5	1	0	0	1	0	0	0	0	0
2012	32	2	10	0	1	4	6	0	2	1	1	1	1	1	1	1	0	1	1	1	1	1	0	1	1	0	0	0	0	1	2	1	0	0	0	1	1	0	0										1
2013	35	3		0	1	1	4	0	1	1	1	1	1	1	1	1	1	1		1	1	0	0	1	1	0	0	0	0	0		0	0	0	0			0	0										0
2014	39	2	18	0	1	4	6	0	2	1	1	1	1	1	0	1	0	1	1	1	1	1	0	1	1	0	0	0	0	1	2	0	0	0	0	1	2	0	0										0
2015	18	1		0	1	4	5	0	3	1	1	1	1	1	1	1	1	1	1	1	1	1	0	1	1	0	0	0	0	0	2	0	0	0	0			0	0										0
2016	42	2	15	0	1	4	5	0	1	1	1	1	1	1	1	1	0	1	1	1	1	0	0	1	1	1	0	0	0	1	2	0	0	0	0	1	4	1	1	2	0								0
2017	42	3	20	0	1	2	3	1	1	1	1	1	1	1	0	1	0	1	1	1	1	1	0	1	0	0	0	0	0	0	1	0	0	0	0	0		0	0										0
2018	45	2	20	0	1	4	5	0	1	1	1	1	1	1	0	1	1	1	1	1	1	0	0	1	1	1	0	0	0	1	2	0	0	0	0	0		0	0										0
2019	33	2	14	0	1	3	5	0	2	1	1	1	1	1	1	1	0	1	1	1	1	0	0	1	1	0	0	0	0	0	2	0	0	0	0	0		0	1	4	0								1
2020	40	2	17	0	1	4	6	0	2	1	1	1	1	1	1	1	0	1	1	1	1	0	0	1	1	0	0	0	0	0	2	0	0	0	0	0		0	0										0
2021	23	2	3	0	1	3	4	0	2	1	1	1	1	1	1	1	0	1	1	1	1	1	1	1	1	0	0	0	0	1	2	1	0	0	1	0		0	1	5	0								0
2022	35	2	10	0	1	4	3	1	2	1	1	1	1	1	0	1	0	1	1	1	1	0	0	1	1	0	0	0	0	0	2	1	0	0	0	0		0	0										1
2023	21	1		0	1	4	6	0	3	1	1	1	1	1	0	1	1	1	1	1	1	0	0	0	1	1	0	0	0	0	2	1	0	0	0	0		0	0										1
2024	25	1			1	4	6	0	1	1	1	1	1	1	1	1	0	1	1	1	1	1	0	0	1	1	0	0	0	0	2	0	0	0	0	0		0	0										0
2025	26	1		0	3		4	0	3	1	1	1	1	0	0	1	0	1	0	0	1	0	0	1	0	0	0	0	0	0	1	0	0	0	0			0	0										0
2026	26	2	8	0	1	4	6	0	2	1	1	1	1	1	0	1	0	1	1	1	1	0	0	1	1	0	0	0	0	0	2	0	0	0	0	1	4	0	0										0
2027	39	2	17	0	1	4	4	0	1	1	1	1	1	1	1	1	0	1	1	1	1	1	1	1	1	0	0	0	0	0	2	0	0	0	0	1	4	0	0										0
2028	35	2	15	0	1	4	5	0	2	1	1	1	1	1	1	1	0	1	1	1	1	1	1	1	1	1	0	0	0	0	2	0	0	0	0	0	5	0	0										0
2029	40	2	16	0	1	1	4	0	2	1	1	1	1	1	1	1	0	1	1	1	1	0	0	1	1	0	0	0	0	0	2	0	0	0	0	1	2	0	0										1
2030	40	2	25	0	1	2	4	0	2	1	1	1	1	1	0	1	0	1	1	1	1	0	0	1	1	0	0	0	0	1	2	0	1	1	0	0	5	0	0										1
2031	41	2	14	0	1	3	6	0	2	1	1	1	1	1	1	1	1	1	1	1	1	1	1	1	1	1	0	0	0	0	2	1	0	0	0	0		0	0										0
2032	27	2	6	0	1	4	6	0	2	1	1	1	1	1	1	1	0	1	1	1	1	0	0	1	1	0	0	0	0	0	2	0	0	0	0	0		0	0										0
2033	43	2	23	0	1	1	4	0	2	1	1	1	1	1	1	1	1	1	1	1	1	1	0	1	1	0	0	0	0	0	2	0	0	0	0	1	4	0	0										0
2034	45	2	22	0	1	3	6	0	1	1	1	1	1	1	1	1	1	1	1	1	1	0	0	1	1	0	0	0	0	0	2	0	0	0	0	1	1	0	0										0
2035	40	2	17	0	1	4	6	0	2	1	1	1	1	1	1	1	0	1	1	1	1	0	0	1	1	0	0	0	0	0	2	0	0	0	0	1	4	0	0										0
2036	40	2	20	0	1	4	4	0	2	1	1	1	1	1	1	1	1	1	1	1	1	1	0	1	1	0	0	0	0	1	2	0	0	0	0	0		0											1
2037	22	1		0	3		5	0	3	1	1	0	1	0	0	0	0	1	0	0	1	0	0	1	0	0	0	0	0	0	1	0	1	0	0			0	0										1
2038	38	1			1	4	6	0	1	1	1	1	1	1	1	1	1	1	1	1	1	1	0	1	1	0	0	0	0	0	2	1	1	1	0			0	0										0
2039	37	2	14	0	1	4	6	0	2	1	1	1	1	1	1	1	1	1	1	1	1	1	0	1	1	1	0	0	0	1	2	0	0	0	0	1	2	0	0										0
2040	23	2	7	0	1	4	1	2	2	1	1	0	0	0	0	0	0	1	1	0	0	0	0	1	0	0	0	0	0	1	1	1	0	0	0	0		0	0										1
2041	43	2	22	0	1	4	4	0	2	1	1	1	1	1	0	1	0	1	1	1	1	1	0	1	0	0	0	0	0	0	1	0	0	0	0	1	4	0	0										0
2042	34	2	13	0	1	4	6	0	2	1	1	1	1	1	1	1	0	1	1	1	1	1	1	1	1	0	0	0	0	0	2	0	0	0	0	0		0											0
2043	19	1			1	4	5	0	3	1	1	1	1	1	1	1	0	1	1	1	1	0	0	1	1	0	0	0	0	1	2	0	0	0	0			0	0										1
2044	37	2	12	0	1	4	6	0	1	1	1	1	1	1	1	1	0	1	1	1	1	1	1	1	1	1	0	0	0	0	2	0	0	0	0	1	1	0	0										0
2045	20	1			1	4	5	0	3	1	1	0	1	0	0	1	0	1	1	1	1	0	0	0	0	0	0	0	0	0	1	0	0	0	0	0		0	0										0
2046	44	2	16	0	1	1	5	0	1	1	1	1	1	1	1	1	0	1	1	1	1	0	0	1	1	1	0	0	0	0	2	0	0	0	0	1	4	0	0										0
2047	28	2	10	0	1	4	6	0	2	1	1	1	1	1	0	1	0	1	1	1	1	1	0	1	1	0	0	0	0	0	2	0	0	0	0	0		0	0										0
2048	34	2	13	0	1	4	6	0	2	1	1	1	1	1	1	1	0	1	1	1	1	0	1	1	1	0	0	0	0	0	2	0	1	1	1	1	4	0	0										1
2049	35	2	10	0	1	4	6	0	2	1	1	1	1	1	1	1	1	1	1	1	1	0	0	1	1	1	0	0	0	0	2	0	0	0	0	1	2	0	0										0
2050	40	2	20	0	1	1	6	0	2	1	1	1	1	1	1	1	0	1	1	1	1	1	0	1	1	0	0	0	0	0	2	0	0	0	0	0		0	0										1
2051	38	2	16		1	3	6	0	2	1	1	1	1	1	1	1	0	1	1	1	1	0	0	1	1	0	0	0	0	0	2	0	0	0	0	0		0	0										0
2052	23	2	4	0	1	3	6	0	2	1	1	1	1	1	1	1	0	1	1	1	1	1	0	0	1	1	0	0	0	0	2	0	0	0	0	1	3	0	0										0
2053	21	1			1	2	6	0	3	1	1	1	1	1	1	1	0	1	1	1	1	1	1	1	1	1	0	0	0	1	2	0	1	0	0			0	0										0
2054	45	2	25	0	1	2	4	0	2	1	1	1	1	1	1	0	1	1	1	1	1	1	0	1	1	0	0	0	0	0	2	1	1	1	0	0		0	0										1
2055	40	2	20	0	1	4	5	0	2	1	1	1	1	1	1	1	0	1	1	1	1	1	0	1	1	0	0	0	0	1	2	0	0	0	0	1	2	0	0										0
2056	33	2	11	0	1	4	6	0	2	1	0	0	0	0	0	0	0	0	0	0	0	1	0	1	1	1	0	0	0	1	1	1	1	1	0	0	1	0	0										0
2057	29	2	10	0	1	4	5	0	2	1	1	1	1	1	1	1	0	1	1	1	1	1	0	1	1	0	0	0	0	0	2	0	0	0	0	1	2	0	0										0
2058	31	2	5	0	1	4	4	0	2	1	1	1	1	1	0	1	1	1	1	1	1	1	0	1	1	0	0	0	0	0	2	0	0	0	0	0		0	0										1
2059	42	2	18	0	1	4	6	0	2	1	1	1	1	1	1	1	0	1	1	1	1	1	0	1	1	0	0	0	0	1	2	0	0	0	0	1	2	0	0										0
2060	21	1		0	1	4	5	0	3	1	1	0	1	0	0	1	1	1	0	1	1	0	0	1	0	0	0	0	0	0	1	0	0	0	0			0	0										0
2061	30	2	11	0	1	4	6	0	2	1	1	1	1	1	1	1	0	1	1	1	1	0	0	1	1	0	0	0	0	0	2	0	0	1	0	1	3	0	0										1
2062	34	2	8	0	1	3	6	0	2	1	1	1	1	1	1	1	0	1	1	1	1	0	0	0	1	0	0	0	0	0	2	0	1	0	0	1	4	0	0										0
2063	42	2	22	0	2		4	0	2	1	1	1	1	1	1	1	0	1	1	1	1	0	0	1	0	0	0	0	0	0	2	0	0	0	0	1	4	0	0										1
2064	40	2	21	0	1	1	6	0	2	1	1	1	1	1	1	1	1	1	1	1	1	1	0	1	1	0	0	0	0	0	2	0	0	1	0	1	4	0	0										0
2065	28	1		0	3		6	0	1	1	1	1	1	1	0	1	0	1	1	1	1	1	0	1	1	0	0	0	0	1	2	0	0	0	0	0		0	0										0
2066	26	2	6	0	1	4	4	0	2	1	1	1	1	1	0	1	0	1	1	1	1	0	1	1	1	0	0	0	0	0	2	0	0	0	0	1	4	0	0										0
2067	32	2	10	0	1	4	6	0	2	1	1	1	1	1	1	1	0	1	1	1	1	0	0	1	1	1	0	0	0	0	2	1	1	0	0	1	1	0	0										0
2068	35	3		0	1	1	1	2	1	1	1	1	1	0	0	1	0	1	1	1	1	0	0	1	1	0	0	0	0	0	1	0	0	0	0			0	0										0
2069	21	1		0	1	3	6	0	3	1	1	1	1	1	1	1	0	1	1	1	1	0	0	1	1	0	0	0	0	0	2	1	1	0	0			0	0										0
2070	30	2	10	0	1	4	4	0	1	1	1	1	1	1	1	1	0	1	1	1	1	0	0	1	1	0	0	0	0	1	2	0	1	1	0	1	1	0	0										0
2071	34	2	15	0	1	1	5	0	2	1	1	1	1	1	1	1	0	1	1	1	1	0	0	1	1	0	0	0	0	0	2	0	0	0	0	1	1	0	0										1
2072	41	2	23	0	1	4	5	0	1	1	1	1	1	1	1	1	0	1	1	1	1	0	0	1	1	0	0	0	0	0	2	0	0	0	0	1	4	0	0										0
2073	41	2	17	0	1	4	5	0	2	1	1	1	1	1	1	1	1	1	1	1	1	1	0	1	1	0	0	0	0	0	2	1	1	0	0	1	1	0	0										0
2074	35	2	5	0	1	4	6	0	1	1	1	0	1	1	1	1	0	1	1	1	1	0	0	0	0	0	0	0	0	0	1	0	0	0	0	0		0	0										0
2075	38	2	13	0	1	3	5	0	2	1	1	1	1	1	1	0	1	1	1	1	1	1	0	1	1	1	0	0	0	1	2	0	1	1	1	1	1	0	0										0
2076	39	2	17	0	1	1	5	0	2	1	1	1	1	1	1	1	0	1	1	1	1	0	0	1	1	0	0	0	0	0	2	0	0	0	0	0		0	0										0
2077	35	2	17	0	1	4	5	0	2	1	1	1	1	1	1	1	0	1	1	1	1	0	0	1	1	0	0	0	0	1	2	0	0	0	0	1	1		1	5	1	0	1	1	1	0	1	0	1
2078	40	2	21	0	1	4	4	0	2	1	1	1	1	1	0	1	0	1	1	1	1	1	0	1	1	0	0	0	0	0	2	0	1	1	0	1	1	0	0										1
2079	37	2	20	0	1	3	1	2	2	1	1	0	1	1	0	1	0	1	1	1	1	0	0	1	1	0	0	0	0	0	1	0	0	0	0	1	4	0	0										1
2080	39	2	16	0	1	4	4	0	2	1	1	0	1	1	1	1	0	1	1	1	1	0	0	1	1	0	0	0	0	0	2	0	1	1	0	1	2	1	1	4	1	0	1	1	0	0	0	0	0
2081	36	2	12	0	1	4	6	0	2	1	1	1	1	1	1	1	1	1	1	1	1	0	0	1	1	0	0	0	0	0	2	0	1	1	0	1	1	0	0										0
2082	45	3		0	1	1	1	2	1	1	1	1	1		1	1	0	1	1	1	1	1	0	1	1	0	0	0	0	0		0	0	0	0			0	0										1
2083	45	2	25	0	3	2	3	1	2	1	1	1	1	1	1	1	1	1	1	1	1	1	0	1	1	0	0	0	0	0	2	0	1	1	0	1	2	0	0										1
2084	18	1	13		1	4	5	0	3	1	1	1	1	1	1	1	0	1	1	1	1	0	0	1	1	0	0	0	0	0	2	0	1	1	0	0		0	0										0
2085	40	2	20	0	1	4	5	0	2	1	1	1	1	1	1	1	1	1	1	1	1	1	0	1	1	0	0	0	0	0	2	0	1	1	0	1	1	0	0										0
2086	20	1			1	3	5	0	3	1	1	1	1	1	1	1	0	1	1	1	1	0	0	1	1	0	0	0	0	0	2	0	1	0	0			0	0										1
2087	35	2	14	0	3		4	0	2	1	1	1	1	1	1	1	0	1	1	1	1	0	0	1	1	0	0	0	0	0	2	0	0	0	0	0		0											1
2088	35	2	19	0	3		4	0	2	1	1	1	1	1	1	1	0	1	1	1	1	1	0	1	1	0	0	0	0	0	2	0	0	0	0	1	3	0	0										1
2089	40	2	15	0	1	2	4	0	2	1	1	1	1	1	1	1	1	1	1	1	1	1	0	1	1	0	0	0	0	0	2	1	0	0	1	1	1	0	0										1
2090	42	2	20	0	1	4	5	0	1	1	1	1	1	1	1	1	0	1	1	1	1	1	0	1	1	0	0	0	0	0	2	1	0	0	0	0		0											0
2091	32	2	1	0	1	4	5	0	1	1	1	1	1	1	1	1	0	1	1	1	1	0	1	1	1	0	0	0	0	0	2	0	0	0	0	0		0	0										0
2092	39	2	3	0	3	2	4	0	2	1	1	1	1	1	0	1	0	1	1	1	1	1	0	1	1	0	0	0	0	0	2	0	0	0	0	0		0											0
2093	37	2	20	0	1	2	4	0	2	1	1	1	1	1	1	1	1	1	1	1	1	1	0	1	1	0	0	0	0	0	2	1	0	0	0	0		0	0										0
2094	36	2	8	0	1	4	6	0	2	1	1	1	1	1	1	1	0	1	1	1	1	0	0	1	1	0	0	0	0	0	2	0	1	0	0	0		0	0										1
2095	39	2	13	0	1	4	5	0	2	1	1	1	1	1	1	1	0	1	1	1	1	0	0	1	1	1	0	0	0	0	2	0	0	0	0	1	1	0	0										0
2096	30	2	4	0	1	1	1	2	2	0	0	0	0	0	0	0	0	0	0	0	1	0	0	1	0	0	0	0	0	0	1	0	0	0	0	0		0	0										1
2097	20	1			1	4	3	1	4	1	1	1	1	1	1	1	0	1	1	1	1	1	0	1	1	0	0	0	0	0	2	0	0	0	0			0	0										1
2098	36	2	11	0	1	4	6	0	2	1	1	1	1	1	1	1	1	1	1	1	1	1	0	1	1	0	0	0	0	0	2	0	1	1	0	0		0	0										0
2099	36	2	14	0	1	4	6	0	2	1	1	1	1	1	1	1	0	1	1	1	1	0	0	1	1	0	0	0	0	0	2	0	1	0	0	1	1	0	0										1
2100	22	1			1	3	6	0	3	0	1	1	1	1	1	1	0	1	1	1	1	0	0	1	0	0	0	0	0	0	2	0	1	0	0			0	0										0
2101	38	2	20	0	1	4	6	0	2	1	1	1	1	1	1	1	1	1	1	1	1	0	0	1	1	0	0	0	0	0	2	0	0	0	0	1	1	0	0										0
2102	23	1			1	1	6	0	1	1	1	1	1	1	1	1	1	1	1	1	1	1	0	1	1	0	0	0	0	0	2	0	0	0	0			0	0										0
2103	23	1			1	4	6	0	1	1	1	1	1	1	1	1	0	1	1	1	1	0	0	1	1	0	0	0	0	0	2	0	0	0	0			0	0										0
2104	42	2	11	0	1	4	6	0	2	1	1	1	1	1	1	1	0	1	1	1	1	1	1	1	1	1	0	0	0	0	2	0	0	0	0	0		0	0										0
2105	42	2	14	0	3		6	0	2	1	1	1	1	1	1	1	0	1	1	1	1	1	0	1	1	0	0	0	0	0	2	0	0	0	0	0		0	0										0
2106	30	2	3	0	3	4	6	0	2	1	1	1	1	1	1	1	0	1	1	1	1	0	0	1	1	1	0	0	0	1	2	0	0	0	0	1	1	0	0										0
2107	30	2	10	0	1	2	6	0	2	1	1	1	1	1	1	1	0	1	1	1	1	1	0	1	1	0	0	0	0	0	2	1	0	0	0	1	1	0	0										0
2108	43	2	26	0	1	2	4	0	2	1	1	1	1	1	1	1	0	1	1	1	1	1	0	1	1	0	0	0	0	0	2	1	0	0	0	1	1	0	0										0
2109	35	2	16	0	1	3	4	0	2	1	1	1	1	1	1	1	0	1	1	1	1	1	0	1	1	0	0	0	0	1	2	0	0	1	0	1	4	0	0										0
2110	40	2	20	0	1	2	1	2	2	1	1	0	1	1	0	1	0	1	1	1	1	0	0	1	0	0	0	0	0	1	1	0	0	0	0	0		0	0										1
2111	33	2	8	0	1	4	6	0	2	1	1	1	1	1	1	1	0	1	1	1	1	0	0	1	1	0	0	0	0	0	2	0	0	0	0	1	1	0	0										0
2112	32	2	14	0	1	1	4	0	2	1	1	1	1	1	1	0	0	1	1	1	1	0	0	1	1	0	0	0	0	0	2	0	0	0	0	1	1	0	0										0
2113	29	2	4	0	1	4	6	0	2	1	1	1	1	1	1	1	0	1	1	1	1	0	1	1	1	0	0	0	0	0	2	0	0	0	0	0		0	0										0
2114	32	2	10	0	1	3	5	0	2	1	1	1	1	1	1	1	0	1	1	1	1	0	0	1	1	0	0	0	0	0	2	1	0	0	0	1	1	0	0										0
2115	25	1		0	1	4	6	0	3	1	1	1	1	1	1	1	0	1	1	1	1	1	0	1	1	0	0	0	0	0	2	1	1	1	0			0	0										1
2116	37	2	15	0	1	4	5	0	2	1	1	1	1	1	1	1	0	1	1	1	1	1	0	1	1	0	0	0	0	0	2	0	1	1	0	0		0	0										0
2117	28	2	10	0	1	4	4	0	2	1	1	1	1	1	0	1	0	0	1	0	1	0	0	1	0	0	0	0	0	0	1	0	0	0	0	1	1		0										0
2118	39	2	15	0	3		6	0	2	1	1	1	1	1	1	1	0	1	1	1	1	1	0	1	1	1	0	0	0	0	2	1	0	1	0	0		0	0										0
2119	40	2	23	0	1	1	1	2	2	1	1	1	1	1	1	1	0	1	1	1	1	0	0	1	1	0	0	0	0	0	2	0	0	0	0	1	4	0	0										1
2120	34	2	14	0	1	4	6	0	2	1	1	1	1	1	1	1	0	1	1	1	1	0	0	1	1	0	0	0	0	1	2	0	0	0	0	1	1	0	0										0
2121	40	2	19	0	1	4	5	0	2	1	1	1	1	1	1	1	0	1	1	1	1	1	0	1	1	0	0	0	0	0	2	0	0	0	0	0		0											1
2122	40	2	20	0	1	1	2	1	2	0	1	1	1	1	0	1	0	1	1	1	1	1	0	1	0	0	0	0	0	0	1	1	1	1	1	1	4	0	0										1
2123	40	2	25	0	1	4	3	1	2	1	1	1	1	1	1	1	0	1	1	1	1	0	0	1	1	0	0	0	0	0	2	0	0	0	0	1	4	0	0										1
2124	33	2	12	0	3		6	0	2	1	1	1	1	1	1	1	0	1	1	1	1	1	0	0	1	0	0	0	0	0	2	1	1	0	1	0		0	0										1
2125	34	2	14	0	1	1	6	0	2	1	1	1	1	1	1	1	0	1	1	1	1	0	0	1	1	0	0	0	0	0	2	1	1	0	0	0		0	0										0
2126	34	2	9	0	1	4	6	0	2	1	1	1	1	1	1	1	0	1	1	1	1	0	0	1	1	0	0	0	0	0	2	0	0	0	0	0		0	0										0
2127	31	1	10	0	1	4	6	0	2	1	1	1	1	1	1	1	1	1	1	1	1	0	0	1	1	1	0	0	0	1	2	1	1	0	0	1	1	0	0										0
2128	35	2	17	0	1	1	5	0	2	1	1	1	1	1	1	1	0	1	1	1	1	0	0	1	1	0	0	0	0	0	2	0	0	0	0	1	4	0	0										1
2129	25	2	4	0	1	4	5	0	2	1	1	1	1	1	1	1	0	1	1	1	1	1	0	0	1	0	0	0	0	0	2	1	0	0	0	0		0	0										0
2130	33	2	13	0	1	1	4	0	2	1	1	1	1	1	1	1	0	1	1	1	1	1	0	1	1	0	0	0	0	0	2	0	0	0	0	1	4	0	0										1
2131	44	2	23	0	1	4	6	0	2	1	1	1	1	1	1	1	1	1	1	1	1	1	0	1	1	1	0	0	0	0	2	0	0	0	0	0		0	0										0
2132	30	2	7	0	1	3	5	0	1	1	1	1	1	1	1	1	0	1	1	1	1	1	0	1	1	0	0	0	0	0	2	0	0	0	0	1	1	0	0										0
2133	40	2	18	0	1	4	6	0	2	1	1	1	1	1	1	1	0	1	1	1	1	0	0	0	1	0	0	0	0	0	2	0	0	0	0	1	1	0	0										0
2134	35	2	17	0	1	2	4	0	2	1	1	1	1	1	1	1	0	1	1	1	1	1	0	1	1	0	0	0	0	0	2	0	0	0	0	1	1	0	0										1
2135	32	2	11	0	1	1	6	0	2	1	1	1	1	1	1	1	0	1	1	1	1	0	0	1	1	0	0	0	0	0	2	0	0	0	0	1	1	0	0										0
2136	26	2	4	0	1	4	6	0	2	1	1	1	1	1	1	1	0	1	1	1	1	1	0	0	1	0	0	0	0	0	2	0	0	0	0	1	1	0	0										0
2137	42	2	30	0	1	3	1	2	2	1	1	1	1	1	1	1	0	1	1	1	1	0	0	1	1	1	0	0	0	0	2	0	0	0	0	0		0	0										0
2138	20	1		0	1	4	6	0	3	1	1	1	1	1	0	1	0	1	1	1	1	0	0	1	1	0	0	0	0	0	2	0	0	0	0	0		0	0										0
2139	23	2	2	0	1	4	6	0	2	1	1	1	1	1	1	1	0	1	1	1	1	1	0	1	1	0	0	0	0	0	2	0	0	0	0	0		0	1	5	0								0
2140	35	2	12	0	1	4	6	0	2	1	1	1	1	1	1	1	0	1	1	1	1	1	0	1	1	1	0	0	1	0	2	0	0	0	0	1	1	0	0										0
2141	32	2	15	0	1	4	4	0	1	1	1	1	1	1	1	1	0	1	1	1	1	1	1	1	1	0	0	0	0	0	2	0	1	0	0	1	4	0	0										0
2142	36	2	18	0	1	1	4	0	2	1	1	1	1	1	1	1	0	1	1	1	1	1	1	1	1	0	0	0	0	0	2	0	0	0	0	1	4	0	0										1
2143	24	2	1	0	1	4	5	0	2	1	1	1	1	1	1	1	0	1	1	1	1	1	1	1	1	1	0	0	0	0	2	0	0	0	0	0		0	0										0
2144	44	2	21	0	3		6	0	1	1	1	1	1	1	1	1	0	1	1	1	1	1	1	1	1	1	0	0	0	0	2	1	1	0	0	0		0	0										1
2145	30	2	9	0	1	4	6	0	2	1	1	1	1	1	1	1	0	1	1	1	1	0	0	1	1	0	0	0	0	0	2	0	1	0	0	1	1	0	1										0
2146	26	2	2	0	4		6	0	2	1	1	1	1	1	1	1	0	1	1	1	1	0	0	1	1	1	0	0	0	0	2	1	0	0	0	0		0	0										1
2147	21	1		0	4	4	6	0	3	1	1	1	1	1	1	1	0	1	1	1	1	0	0	1	1	1	0	0	0	0	2	0	0	0	0			0	0										0
2148	43	2	18	0	1	4	5	0	2	1	1	1	1	1	1	1	0	1	1	1	1	1	0	1	1	1	0	0	0	0	2	1	1	0	0	0		0	0										1
2149	30	2	8	0	3		6	0	2	1	1	1	1	1	1	1	1	1	1	1	1	0	0	1	1	0	0	0	0	1	2	0	0	0	1	0		0	0										0
2150	25	2	11	0	1	4	6	0	2	1	1	1	1	1	1	1	0	1	1	1	1	0	0	1	1	0	0	0	0	0	2	0	0	0	0	1	1	0	0										1
2151	24	1		0	1	2	6	0	3	1	1	1	1	1	1	1	0	1	1	1	1	1	0	1	1	0	0	0	0	0	2	0	1	1	0			0	0										1
2152	22	1			1	4	5	0	3	0	1	1	1	0	0	1	0	1	1	1	1	0	0	0	0	0	0	0	0	0	1	0	0	0	0			0	0										0
2153	34	2	13	0	1	4	5	0	2	1	1	1	1	1	1	1	0	0	0	0	1	0	0	1	1	0	0	0	0	0	1	0	0	0	0	1	3	0	0										0
2154	37	1		0	1	4	5	0	2	1	1	1	1	1	1	1	0	1	1	1	1	1	0	0	1	0	0	0	0	0	2	0	1	0	0			0	0										1
2155	34	2	8	0	1	4	6	0	2	1	1	1	1	1	1	1	0	1	1	1	1	1	0	1	1	0	0	0	0	0	2	0	0	0	0	1	3	0	0										1
2156	40	2	16	0	1	4	5	0	2	1	1	1	1	1	1	1	0	1	1	1	1	1	0	1	1	0	0	0	0	0	2	1	0	0	0	1	3	0	0										0
2157	29	2	9	0	1	4	5	0	2	1	1	1	1	1	1	1	1	1	1	1	1	0	0	1	1	0	0	0	0	0	2	0	0	0	0	1	1	0	0										0
2158	32	2	8	0	1	4	6	0	2	1	1	1	1	1	1	1	0	1	1	1	1	0	0	1	1	1	0	0	0	0	2	1	0	0	0	1	4	0	0										0
2159	32	2	14	0	1	4	6	0	2	1	1	1	1	1	1	1	1	1	1	1	1	1	0	1	1	0	0	0	0	0	2	0	0	0	0	1	1	0	0										0
2160	39	2	22	0	1	4	4	0	2	1	1	1	1	1	1	1	0	1	1	1	1	1	1	1	1	0	0	0	0	0	2	0	0	0	0	1	1	0	0										1
2161	36	2	14	0	3		5	0	2	1	1	1	1	1	1	1	0	1	0	1	1	0	0	1	1	1	0	0	0	0	2	1	0	1	0	1	1	0	0										1
2162	30	3		0	1	1	1	2	2	0	1	0	0	0	0	0	0	1	1	0	0	0	0	0	0	0	0	0	0	0	1	0	1	0	0			0	0										1
2163	41	2	17	0	1	1	4	0	2	1	1	1	1	1	1	1	1	1	1	1	1	1	0	0	1	1	0	0	0	0	2	0	0	0	0	1	2	0	0										0
2164	39	2	20	0	1	4	6	0	2	1	1	1	1	1	1	1	0	1	1	1	1	0	0	1	1	1	0	0	0	0	2	1	1	1	1	1	5	0	0										1
2165	36	2	10	0	1	4	6	0	2	1	1	1	1	1	1	1	0	1	1	1	1	1	1	1	1	1	0	0	0	0	2	0	0	0	0	0		0	0										0
2166	35	2	15	0	1	4	6	0	2	1	1	1	1	1	1	1	0	1	1	1	1	1	0	1	1	0	0	0	0	0	2	0	0	0	0	1	1	0	0										0
2167	23	2	3	0	1	2	6	0	2	1	1	1	1	1	0	1	0	1	1	1	1	0	0	0	1	0	0	0	0	0	2	1	0	0	1	0		0	0										1
2168	40	2	20	0	1	4	4	0	2	1	1	1	1	1	1	1	0	1	1	1	1	0	0	1	1	0	0	0	0	0	2	1	0	1	0	1	4	0	0										1
2169	35	2	15	0	1	4	5	0	2	1	1	1	1	1	1	1	0	1	1	1	1	0	0	0	1	0	0	0	0	0	2	0	0	0	0	1	1	0	0										0
2170	45	2	22	0	3		6	0	2	1	1	1	1	1	1	1	0	1	1	1	1	0	0	1	1	0	0	0	0	0	2	0	0	0	0	1	3	0	0										1
2171	43	2	20	0	3		5	0	2	1	1	1	1	1	1	1	0	1	1	1	1	1	0	1	1	0	0	0	0	0	2	0	0	0	0	0		0	0										0
2172	36	2	15	0	1	1	5	0		1	1	1	1	1	1	0	1	1	1	1	1	0	0	1	1	0	0	0	0	0	2	1	0	0	1	1	3	0	0										1
2173	36	2	10	0	1	4	6	0	2	1	1	1	1	1	1	1	0	1	1	1	1	1	1	1	1	0	0	0	0	0	2	0	0	0	0	1	1	0	0										0
2174	39	2	16	0	1	2	6	0	2	1	1	1	1	1	1	1	0	1	1	1	1	1	0	0	1	1	0	0	0	0	2	0	0	0	0	0		0	0										0
2175	27	2	7	0	3		5	0	1	1	1	1	1	1	1	1	0	1	1	1	1	1	1	1	1	0	0	0	0	0	2	0	1	1	0	0		0	0										0
2176	29	2	7	0	1	4	5	0	2	1	1	1	1	1	1	1	0	1	1	1	1	0	0	1	1	0	0	0	0	0	2	0	0	0	0	1	4	0	1	5	0								1
2177	45	2	25	0	1	2	3	1	2	1	1	1	1	1	0	1	0	1	1	1	1	1	1	1	0	0	1	0	0	0	1	0	0	0	0	0		0	0										1
2178	44	2	24	0	3		6	0	2	1	1	1	1	1	1	1	0	1	1	1	1	0	0	0	1	0	0	0	0	0	2	0	0	0	0	0		0	0										1
2179	45	2	32	0	1	4	4	0	2	1	1	1	1	1	1	1	0	1	1	1	1	0	0	1	1	0	0	0	0	1	2	0	0	0	0	0		0	0										1
2180	34	2	11	0	1	4	4	0	2	1	1	1	1	1	1	1	0	1	1	1	1	0	0	1	1	0	0	0	0	0	2	1	0	0	1	1	1	0	0										1
2181	34	2	11	0	1	4	5	0	2	1	1	1	1	1	1	1	0	1	1	1	1	0	0	1	1	0	0	0	0	0	2	0	0	0	0	1	1	0	0										1
2182	40	2	26	0	1	1	4	0	2	1	1	1	1	1	0	1	0	1	1	1	1	1	0	1	1	0	0	0	0	0	2	0	0	0	0	1	4	0	0										1
2183	45	1	20	0	3		5	0	2	1	1	1	1	1	1	1	0	1	1	1	1	0	0	1	1	0	0	0	0	0	2	0	0	0	0	1	1	0	1										1
2184	42	2	20	0	1	4	6	0	2	1	1	1	1	1	1	1	0	1	1	1	1	0	0	1	1	0	0	0	0	0	2	0	0	0	0	1	1	0	0										0
2185	42	2	21	0	2		5	0	2	1	1	1	1	1	1	1	0	1	1	1	1	1	0	1	1	0	0	0	0	0	2	0	0	0	0	0		0	0										0
2186	40	2	18	0	3		5	0	2	1	1	1	1	1	1	1	0	1	1	1	1	1	0	1	1	1	0	0	0	0	2	0	0	0	0	0		0	0										1
2187	43	2	16	0	3		4	0	2	1	1	1	1	1	1	1	0	1	1	1	1	0	0	1	1	0	0	0	0	0	2	0	0	0	0	1	1	0	0										0
2188	37	2	15	0	1	2	2	1	2	1	1	1	1	1	1	1	0	1	1	1	1	0	0	1	1	0	0	0	0	0	2	0	0	0	0	0		0	0										0
2189	40	2	19	0	1	3	4	0	2	1	1	1	1	1	1	1	0	1	1	1	1	0	0	1	1	0	0	0	0	0	2	0	0	0	0	0		0	0										1
2190	34	2	17	0	1	1	4	0	2	1	1	1	1	1	1	1	0	1	1	1	1	0	0	1	0	0	0	0	0	0	2	0	0	0	0	1	4	0	0										0
2191	27	2	13	0	1	2	1	2	2	0	1	0	0	0	0	1	0	0	0	0	0	0	0	1	0	0	0	0	0	0	1	1	0	0	0	1	4	0	0										1
2192	28	2	8	0	1	2	1	2	2	0	1	0	0	0	0	1	0	0	1	0	0	0	0	1	0	0	0	0	0	0	1	0	0	0	0	1	4	0	0										1
2193	28	2	12	0	1	2	1	2	2	0	1	0	1	0	0	1	0	0	1	0	1	0	0	1	0	0	0	0	0	0	1	0	0	0	0	1	4	0	0										1
2194	22	1		0	1	3	6	0	3	1	1	1	1	1	1	1	0	1	1	1	1	0	0	1	1	0	0	0	0	0	2	1	1	0	0			0	0										0
2195	35	2	12	0	1	4	6	0	2	1	1	1	1	1	1	1	0	1	1	1	1	0	0	1	1	0	0	0	0	0	2	0	0	0	0	1	1	0	0										1
2196	22	1			3		4	0	3	1	1	1	1	0	0	1	0	1	1	1	1	0	0	1	0	0	0	0	0	0	1	0	0	0	0			0	0										0
2197	27	1			1	3	6	0	3	1	1	1	1	1	1	1	0	1	1	1	1	1	0	1	1	0	0	0	0	0	2	1	0	0	0			0	0										1
2198	24	1			1	4	6	0	1	1	1	1	1	1	0	1	0	1	1	1	1	0	0	1	1	0	0	0	0	0	2	1	1	0	0			0	0										1
2199	33	2	13	0	1	1	4	0	2	1	1	1	0	1	1	1	0	1	1	1	1	1	0	1	0	0	0	0	0	0	1	0	0	0	0	0		0	0										0
2200	39	2	15	0	1	4	6	0	1	1	1	1	1	1	1	1	0	1	1	1	1	0	0	1	1	0	0	0	0	0	2	0	0	0	0	1	3	0	0										0
2201	35	2	15	0	1	4	5	0	2	1	1	1	1	1	1	1	0	1	1	1	1	0	0	1	1	0	0	0	0	0	2	1	1	0	0	0		0	0										1
2202	32	2	14	0	1	1	4	0	2	1	1	1	1	1	1	1	0	1	1	1	1	0	0	1	1	0	0	0	0	0	2	1	1	0	0	1	1	0	0										1
2203	39	2	14	0	1	4	6	0	2	1	1	1	1	1	1	1	0	1	1	1	1	1	0	1	1	1	0	0	0	0	2	0	1	1	0	0		0	0										1
2204	29	2	10	0	1	1	5	0	2	1	1	1	1	1	1	1	0	1	1	1	1	0	0	1	1	0	0	0	0	0	2	1	1	0	0	1	1	0	0										1
2205	36	2	17	0	1	3	4	0	2	1	1	1	1	1	1	0	0	1	1	1	1	0	0	1	1	1	0	0	0	0	2	0	0	0	0	1	3	0	0										0
2206	35	2	17	0	1	4	5	0	2	1	1	1	1	1	1	1	0	1	1	1	1	0	0	1	1	0	0	0	0	0	2	0	1	1	0	1	1	0	0										1
2207	38	2	18	0	1	2	3	1	2	1	1	1	1	1	1	1	0	1	1	1	1	0	0	0	1	0	0	0	0	0	2	0	0	0	0	1	4	0	0										1
2208	35	2	9	0	3		5	0	2	1	1	1	1	1	1	1	0	1	1	1	1	1	1	1	1	1	0	0	0	0	2	1	0	1	1	1	1	0	0										1
2209	21	1		0	1	1	6	0	3	1	1	1	1	1	1	1	1	1	1	1	1	1	0	1	1	1	0	0	0	0	2	1	0	0	0			0	0										1
2210	24	2	7	0	1	2	5	0	2	1	1	1	1	1	1	1	0	1	1	1	1	0	0	1	1	0	0	0	0	0	2	0	0	0	0	1	1	0	0										0
2211	36	2	17	0	1	4	4	0	2	1	1	1	1	1	1	1	0	1	1	1	1	0	0	1	1	0	0	0	0	0	2	0	0	0	0	0		0	0										0
2212	39	2	13	0	1	4	5	0	2	1	1	1	1	1	1	1	0	1	1	1	1	0	0	1	1	0	0	0	0	0	2	0	0	0	0	0		0	0										1
2213	25	2	7	0	1	1	3	1	2	0	1	0	0	0	0	0	0	0	0	0	1	0	0	0	0	0	0	0	0	0	1	0	0	0	0	0		0	0										0
2214	35	2	17	0	1	4	5	0	2	1	1	1	1	1	1	1	0	1	1	1	1	0	0	1	1	0	0	0	0	0	2	0	1	0	1	1	2	0	0										1
2215	40	2	20	0	1	2	4	0	2	1	1	0	1	0	0	1	0	1	1		1	0	0	0	1	0	0	0	0	0		0	0	0	0	1	4	0	0										0
2216	27	2	6	0	1	4	6	0	2	1	1	1	1	1	1	1	0	1	1	1	1	1	0	1	1	0	0	0	0	0	2	0	1	0	0	1	1	0	0										1
2217	35	2	13	0	1	1	4	0	2	1	1	1	1	1	0	1	1	0	1	1	1	0	0	1	0	0	0	0	0	0	1	0	0	0	0	1	1	0											1
2218	31	2	7	0	1	4	6	0	2	1	1	1	1	1	1	1	0	1	1	1	1	1	0	1	1	0	0	0	0	0	2	1	1	0	0	0		0	0										1
2219	26	2	2	0	1	4	6	0	2	1	1	1	1	1	1	1	0	1	1	1	1	1	0	1	1	0	0	0	0	0	2	0	0	0	0	0		0											0
2220	35	2	10	0	1	1	3	1	2	1	1	0	0	0	0	1	0	0	0	1	1	0	0	1	0	0	0	0	0	0	1	1	0	0	0	0		0	0										1
2221	45	2	26	0	1	4	4	0	1	1	1	1		1	1	1	0	1	1	1	1	0	0	0	1	0	0	0	0	0		0	0	0	0	1	1	0	0										1
2222	40	2	27	0	1	4	1	2	2	1	1	1	1	1	0	1	0	1	1	1	1	0	0	1	1	0	0	0	0	0	2	0	0	0	0	0		0	0										1
2223	41	2	20	0	1	1	3	1	2	1	1	1	1	1	1	1	0	1	1	1	1	0	0	0	1	0	0	0	0	0	2	0	0	0	0	0		0	0										1
2224	39	2	19	0	1	2	4	0	2	1	1	1	1	1	1	1	0	1	1	1	1	0	0	1	1	0	0	0	0	0	2	0	0	0	0	1	1	0	0										1
2225	42	2	27	0	1	4	4	0	2	1	1	1	1	1	1	1	0	1	1	1	1	0	0	1	1	0	0	0	0	0	2	0	0	0	0	1	4	0	0										1
2226	19	1		0	3		4	0	3	0	1	0	1	0	0	1	0	1	1	1	1	0	0	1	0	0	0	0	0	0	1	0	0	0	0			0	0										1
2227	27	1		0	1	1	5	0	3	1	1	0	1	0	0	1	0	1	1	1	1	0	0	1	0	0	0	0	0	0	1	0	0	0	0			0	0										1
2228	39	2	17	0	1	4	6	0	1	1	1	1	1	1	1	1	0	1	1	1	1	1	0	1	1	0	0	0	0	0	2	0	0	0	0	1	4	0	0										0
2229	35	2	10	0	1	2	4	0	2	1	1	1	1	1	0	1	1	1	1	1	1	0	0	1	1	0	0	0	0	0	2	0	0	0	0	0		0	0										0
2230	23	2	4	0	1	2	5	0	3	0	1	0	1	0	0	1	0	1	1	0	1	0	0	1	0	0	0	0	0	0	1	0	1	1	0	0		0	0										1
2231	18	1			1	4	4	0	3	1	1	1	1	1	1	1	0	1	1	1	1	0	1	1	1	1	0	0	0	0	2	0	0	0	0			0	0										0
2232	18	1	13		3		4	0	3	1	1	1	1	1	0	1	0	0	1	0	1	1	0	1	1	0	0	0	0	0	1	1	0	0	1			0	0										1
2233	18	1			1	2	4	0	3	1	1	0	1	0	0	0	0	0	1	0	1	0	0	1	0	0	0	0	0	0	1	0	0	0	0			0	0										0
2234	25	1			3		6	0	1	1	1	1	1	1	1	1	1	1	1	1	1	1	1	1	1	0	0	0	0	0	2	0	1	0	0			0	0										0
2235	21	2	2	0	3		4	0	2	1	1	1	1	0	0	1	0	0	1	1	0	0	0	1	0	0	0	0	0	0	1	1	1	0	0	0		0	0										1
2236	22	1		0	1	4	5	0	3	1	1	1	1	1	1	1	1	1	1	1	1	1	1	1	1	1	0	0	0	0	2	0	0	0	0	0		0	0										0
2237	23	1			3		4	0	3	1	1	0	1	0	0	1	0	0	1	1	1	0	0	1	1	0	0	0	0	0	1	0	0	0	0			0	0										0
2238	24	2	3	0	3		5	0	2	1	1	1	1	1	0	1	0	1	1	1	1	0	0	1	0	0	0	0	0	0	1	1	1	1	0	1	2	0	0										1
2239	18	1			1	2	4	0	3	1	1	1	1	1	1	1	0	1	1	1	1	1	0	1	1	0	0	0	0	0	2	0	1	1	0			0	0										1
[truncated: 17 more columns]

## Sheet: Codes
Question Number	Variable	Prompt	Type of Variable	Values
Unique Id	pid1	Participant ID	Numerical (Continuous)	Unique integer
Date of interview	Dat1	Date of the interview	Date
1	age1	How old are you ?	Numerical (Continuous)
2	mar_stat1	What is your marital status (Select one)	Categorical	1= Single, never married 2 = Married 3 =Widowed 4 = Divorced 5 = Separated 6= Others
2bi.	yrs_mar1	How many years have you been married ?	Numerical (Continuous)
5	relgn1	What is your religion?	Categorical	1= Hindu 2= Muslim 3=Christian 4= Other
6	cas_trb1	What is your caste or tribe?	Categorical	1= Scheduled caste (SC) 2= Scheduled tribe (ST) 3 = Other backward caste (OBC) 4= Other caste
7	hig_edu1	What is the highest standard year of education that you have completed ?	Categorical	1= No formal education 2= Some primary (1-4th year) 3 = Completed primary (5th year) 4= Some secondary (6-10th year) 5= Completed +2 year (12th year) 6 = Completed +3 year (university, etc)
	hig_edu1cat3rev	What is the highest standard year of education that you have completed ?(recategorised)	Categorical	0=Secondary or more (4,5,6),1=Some primary (2,3), 2=None (1)
8	occu1	What is your occupation ?	Categorical	1= Employed or self-employed 2= Housewife 3= Student 4= Other
15a.	watch_clock	Do any members of your household own Watch or Clock ?	Binary	1= Yes 0=No
15b.	pressure_cooker	Do any members of your household own Pressure Cooker ?	Binary	1= Yes 0=No
15c.	telephone_mobilephone	Do any members of your household ownTelephone/Mobile Phone ?	Binary	1= Yes 0=No
15d.	television_	Do any members of your household own Television ?	Binary	1= Yes 0=No
15e.	refrigerator	Do any members of your household own Refrigerator ?	Binary	1= Yes 0=No
15f.	chair_	Do any members of your household own Chair ?	Binary	1= Yes 0=No
15g.	radio	Do any members of your household own Radio ?	Binary	1= Yes 0=No
15h.	mattress_	Do any members of your household own Mattress ?	Binary	1= Yes 0=No
15i.	cot_bed	Do any members of your household own Cot or Bed ?	Binary	1= Yes 0=No
15j.	table_	Do any members of your household own Table ?	Binary	1= Yes 0=No
15k.	electric_fan	Do any members of your household own Electric fan ?	Binary	1= Yes 0=No
15l.	sewing_machine	Do any members of your household own Sewing machine ?	Binary	1= Yes 0=No
15m.	water_pump	Do any members of your household own Water pump ?	Binary	1= Yes 0=No
15n.	bicycle_	Do any members of your household own Bicycle ?	Binary	1= Yes 0=No
15o.	motorbike_scooter	Do any members of your household own Motorbike/Scooter ?	Binary	1= Yes 0=No
15p.	car_	Do any members of your household own Car ?	Binary	1= Yes 0=No
15q.	animaldrawn_cart	Do any members of your household own Animal drawn cart ?	Binary	1= Yes 0=No
15r.	thresher_	Do any members of your household own Thresher ?	Binary	1= Yes 0=No
15s.	tractor_	Do any members of your household own Tractor ?	Binary	1= Yes 0=No
15t.	agricultural_land	Do any members of your household own Agricultural land ?	Binary	1= Yes 0=No
	wealth_index2	Wealth Index created from items at home	Binary	1=Poorer,2=Richer
18	vag_dis	Do you have abnormal vaginal discharge? (more abundant than normally)	Binary	1= Yes 0=No
19	fel_itch	Do you have a feeling of burning or itching in the genitalia (vulvovaginal area) ?	Binary	1= Yes 0=No
20	itch_uri	Do you have a feeling of burning or itching when urinating ?	Binary	1= Yes 0=No
21	gen_sor	Do you have genital sores ?	Binary	1= Yes 0=No
28	use_con	Do you use any type of Contraceptive method at the moment?	Categorical	0=No 1=Yes 2=I Don’t know
29	wch_con	If you use a contraceptive method, choose which one?	Categorical	1= Condom use 2= Injections or birth control pills 3= Intrauterine device 4= Tubal ligation 5= Other
31	recu_cli	Is the problem why you are coming to the clinic a recurrent one (it is happening more than once) ?	Binary	1= Yes 0=No
32	prob_apper	How often these problems appeared in the last year approximately ?	Categorical	1= Every Months 2= 6 times in a year 3= 4 times in a year 4= 3 times in a year 5= Other
33	chg_hyg	Did you change your menstrual hygienic habits after having this recurrent symptom?	Binary	1= Yes 0=No
34a.	menstrual_absorbent	If yes, did you change Menstrual absorbent type ?	Binary	1= Yes 0=No
34b.	vaginal_washing	If yes, did you change Vaginal washing practices ?	Binary	1= Yes 0=No
34c.	body_washing	If yes, did you change Body washing practices ?	Binary	1= Yes 0=No
34d.	absorbent_washing	If yes, did you change Absorbent washing practices(If applied) ?	Binary	1= Yes 0=No
34e.	place_changing	If yes, did you change Place for changing menstrual absorbent ?	Binary	1= Yes 0=No
34f.	place_defecate	If yes, did you change Place to defecate or urinate every day ?	Binary	1= Yes 0=No
34g.	place_urinate	If yes, did you change Place to defecate or urinate during menstruation ?	Binary	1= Yes 0=No
35	abs_mat35	What absorbent material did you use most often during the last 6 cycles?	Categorical	0= Disposable sanitary pads 1= reusable cloths/towel 3= tampon 4= nothing 5= other
36	chn_abs363	How often did you change the absorbent material in your more heavy days?	Categorical	0=3 times, 1=twice,2=once
37	sty_men	Do you normally stay at home when when menstruating?	Binary	1= Yes 0=No
38	whr_chg383	Where did you change your absorbent material?	Categorical	0=Outdoors,1=At private room, 2=At Household toilet
46a.	awas_prc463	What type of washing (bath or vaginal wash) did you practice during Menstruation	Categorical	0=Both(body and vagina),1=Only bath of full body, 2=Only vaginal wash
47a.	aoft_was3	How often did you wash yourself (bath or vaginal wash) during Menstruation	Categorical	0=Twice a day,1=Once a day,2=Only first day
48a.	awat_use148rev	What did you use to wash yourself (bath or vaginal wash) during Menstrution	Categorical	0=Water and Soap,1=Water only
58	toilet	Is there a toilet facility in your household?	Binary	0=Yes,1=No
50	pr_wtsrc502	Where is the primary water source located?	Binary	0=In your house,1=Outside home
40	reus_was403	If you reuse it, where did you wash it?	Categorical	0=Toilet,1=Tube well or yard house,2=pond or river
41	was_san41	How did you wash your sanitary cloths?	Categorical	1= With water 2= With water and soap or detergent 3= With water and mud/ash 4= Other……………
42	dry_clth42	After washing it, how did you dry the cloth?	Categorical	1= Dry it in the sun or open space,2=Dry inside house
43	43.str_clth	How did you store the cloth for use next time?	Categorical	1= Wrapped in polythene 2= Wrapped in another material - 3= Wrapped in nothing 4=Other……….
44	whr_clth44rev	Where do you store the cloth for use next time?	Categorical	0=In the toilet,1=Hidden within clothes,3=In some place of the changing room
Lab Results	ams_pos	Amsel test	Binary	0= Negative 1= positive
Lab Results	ur_tes	Urine Test	Binary	0= Culture Negative 1= Culture positive
	syntcase	Syntomatology case/control	Binary	0= Control 1= Case
	BVuticase	Being BV or UTI(+)=case,not being BV or UTI (excluding symptomatic controls)	Binary	0= Control 1= Case
